# Supplementary material for: Efficient conversion of arylene precursors into photoluminescent phosphonates for surface modification of metal oxides
Source: Royal Society of Chemistry journal article supplement (doi:10.1039/c2dt32553e), 2013-01-01

SUPPORTING INFORMATION

## Efficient Conversion of Arylene Precursors into Photoluminescent Phosphonates for Surface Modification of Metal Oxides

---

Ezgi Keceli,<sup>†</sup> Maximilian Hemgesberg,<sup>†</sup> Sarah Bay,<sup>‡</sup> Yu Sun,<sup>†</sup> Thomas J. J. Müller,<sup>‡</sup> and Werner R. Thiel<sup>†,\*</sup>

<sup>†</sup> Technische Universität Kaiserslautern, Fachbereich Chemie,  
Erwin-Schrödinger-Straße 54, 67663 Kaiserslautern, Germany

Fax: +49-631-2054676

E-mail: thiel@chemie.uni-kl.de

<sup>‡</sup> Heinrich-Heine-Universität Düsseldorf, Institut für Organische Chemie und Makromolekulare Chemie,  
Universitätsstraße 1, D-40225 Düsseldorf, Germany

### Table of Contents

|                               |           |
|-------------------------------|-----------|
| Experimental procedures ..... | S2 – S9   |
| Crystallographic data .....   | S10 – S14 |
| NMR spectra .....             | S15 – S28 |
| IR spectra .....              | S29 – S34 |

## Experimental Procedures

### Dibutyl-5,5'-(1,4-phenylene)bis(thiophene-2-carboxylate) (1b)

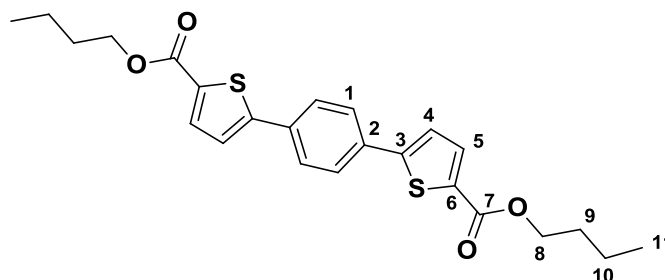

1,4-Bis(5-iodothiophen-2-yl)benzene (**1a**) (1.00 g, 2.02 mmol) was suspended in anhydrous DMF (10.00 mL) under a nitrogen atmosphere.  $\text{PPh}_3$  (0.05 g, 0.17 mmol), anhydrous *n*-butanol (10.0 mL) and  $\text{Et}_3\text{N}$  (1.50 mL) were added to the mixture. After adding  $\text{Pd}(\text{OAc})_2$  (0.01 g, 0.06 mmol) the autoclave was closed and pressurized with 15 bar of CO. The reaction was stirred at 100 °C for 30 h. After releasing the CO pressure, the reaction mixture was filtered over celite®. Deionized water was added to the filtrate to precipitate the product. The resulting crystals were collected by filtration (yield 0.72 g, 81 %).

$^1\text{H}$  NMR (400 MHz,  $\text{CDCl}_3$ ):  $\delta$  7.76 (d,  $J=4.0$  Hz, 2H, H5), 7.65 (s, 4H, H1), 7.31 (d,  $J=4.0$  Hz, 2H, H4), 4.31 (t,  $J=6.8$  Hz, 4H, H8), 1.78 – 1.71 (m, 4H, H9), 1.52 – 1.43 (m, 4H, H10), 0.98 (t,  $J=7.2$  Hz, 6H, H11) ppm.

$^{13}\text{C}$  NMR (101 MHz,  $\text{CDCl}_3$ ):  $\delta$  162.3 (C7), 150.0 (C3), 134.3 (C5), 133.8 (C6), 133.1 (C2), 126.8 (C1), 124.0 (C4), 65.2 (C8), 31.0 (C9), 19.3 (C10), 13.4 (C11) ppm.

IR (ATR,  $\text{cm}^{-1}$ ):  $\nu$  2960, 2934, 2875, 1689, 1478, 1441.

Elemental analysis:  $\text{C}_{24}\text{H}_{26}\text{O}_4\text{S}_2$  (442.59 g/mol)

|            |   |            |           |            |
|------------|---|------------|-----------|------------|
| Calculated | : | C: 65.13 % | H: 5.92 % | S: 14.49 % |
| Found      | : | C: 64.87 % | H: 5.67 % | S: 14.79 % |

### Dibutyl-5,5'-(2,5-dimethyl-1,4-phenylene)bis(thiophene-2-carboxylate) (2b)

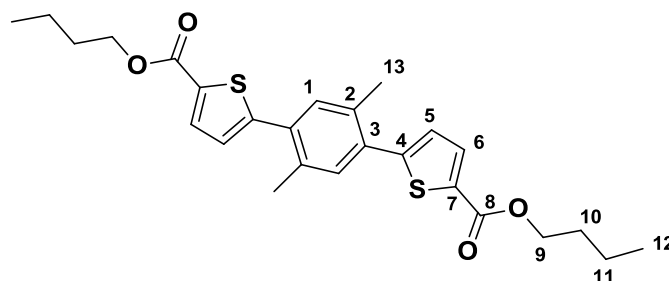

5,5'-(2,5-Dimethyl-1,4-phenylene)bis(2-iodothiophene) (**2a**) (3.00 g, 5.74 mmol) was suspended in anhydrous DMF (30.00 mL) under a nitrogen atmosphere. PPh<sub>3</sub> (0.10 g, 0.40 mmol), anhydrous *n*-butanol (30 mL) and Et<sub>3</sub>N (3.00 mL) were added to the mixture. After adding Pd(OAc)<sub>2</sub> (0.03 g, 0.13 mmol) the autoclave was closed and pressurized with 15 bar of CO. The reaction was stirred at 100 °C for 30 h. The reaction mixture was filtered over celite®. Deionized water was added to the filtrate to precipitate the product. The resulting crystals were collected by filtration (yield: 2.20 g, 81 %).

<sup>1</sup>H NMR (400 MHz, CDCl<sub>3</sub>): δ 7.78 (d, *J*= 3.7 Hz, 2H, H6), 7.34 (s, 2H, H1), 7.09 (d, *J*= 3.7 Hz, 2H, H5), 4.32 (t, *J*= 6.6 Hz, 4H, H9), 2.43 (s, 6H, H13), 1.78 – 1.71 (m, 4H, H10), 1.52 – 1.43 (m, 4H, H11), 0.98 (t, *J*= 7.4 Hz, 6H, H12) ppm.

<sup>13</sup>C NMR (101 MHz, CDCl<sub>3</sub>): δ 162.5 (C8), 149.5 (C4), 133.8, 133.6, 133.6 (C7, C3, C2), 133.5 (C6), 132.9 (C1), 127.4 (C5) 65.2 (C9), 30.9 (C10), 20.7 (C13), 19.3 (C11), 13.9 (C12) ppm.

IR (ATR, cm<sup>-1</sup>): ν 2959, 2935, 2873, 1697, 1541, 1506, 1450, 1327, 1318, 1254, 1231, 1092.

Elemental analysis: C<sub>26</sub>H<sub>30</sub>O<sub>4</sub>S<sub>2</sub> (470.64 g/mol)

|            |   |            |           |            |
|------------|---|------------|-----------|------------|
| Calculated | : | C: 66.35 % | H: 6.42 % | S: 13.63 % |
| Found      | : | C: 66.28 % | H: 6.45 % | S: 13.89 % |

### Tributyl 5,5',5''-(nitriiotris(benzene-4,1-diyl))tris(thiophene-2-carboxylate) (**3b**)

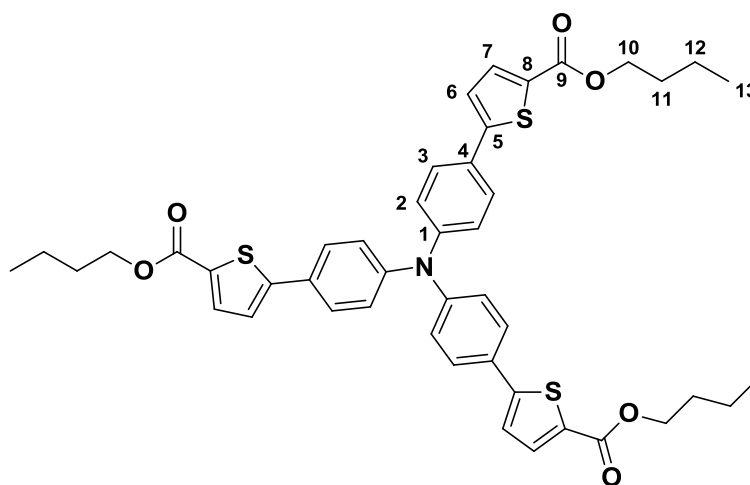

Tris (4-(5-iodothiophen-2-yl)phenyl)amine (**3a**) (2.00 g, 2.30 mmol) was suspended in anhydrous DMF (30.00 mL) under a nitrogen atmosphere. PPh<sub>3</sub> (0.10 g, 0.35 mmol), anhydrous *n*-butanol (30 mL) and Et<sub>3</sub>N (3.00 mL) were added to the mixture. After adding Pd(OAc)<sub>2</sub> (0.02 g, 0.12 mmol) the autoclave was closed and pressurized with 15 bar of CO. The reaction was stirred at 100 °C for 30 h. The reaction mixture was filtered over celite®. Deionized water was added to the filtrate to precipitate the product. The resulting crystals were collected by filtration (yield: 1.50 g, 82 %).

<sup>1</sup>H NMR (400 MHz, CDCl<sub>3</sub>): δ 7.75 (d, *J*= 3.9 Hz, 3H, H7), 7.56 (d, *J*= 8.6 Hz, 6H, H2), 7.23 (d, *J*= 3.9 Hz, 3H, H6), 7.16 (d, *J*= 8.6 Hz, 6H, H3), 4.31 (t, *J*= 6.6 Hz, 6H, H10), 1.78 – 1.71 (m, 6H, H11), 1.52 – 1.43 (m, 6H, H12), 0.98 (t, *J*= 7.4 Hz, 9H, H13) ppm.

$^{13}\text{C}$  NMR (101 MHz,  $\text{CDCl}_3$ ):  $\delta$  162.5 (C9), 150.7 (C5), 147.3 (C1), 134.4 (C7), 132.1 (C8), 128.8 (C4), 127.4 (C3), 124.7 (C2), 123.2 (C6), 65.2 (C10), 30.9 (C11), 19.4 (C12), 13.9 (C13) ppm.

IR (ATR,  $\text{cm}^{-1}$ ):  $\nu$  2959, 2934, 2873, 1698, 1443, 1261, 1090, 745, 660.

Elemental analysis:  $\text{C}_{45}\text{H}_{45}\text{NO}_6\text{S}_3$  (792.04 g/mol)

Calculated : C: 68.24 % H: 5.73 % N: 1.77 % S: 12.15 %

Found : C: 68.14 % H: 5.67 % N: 1.74 % S: 12.34 %

### 5,5'-(1,4-Phenylene)bis(thiophene-5,2-diyl)dimethanol (1c)

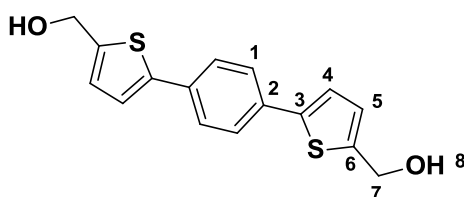

$\text{LiAlH}_4$  (10.20 mmol, 0.38 g) was suspended in anhydrous THF (15 mL) under a nitrogen atmosphere. In another flask, 2.40 g (5.10 mmol) of **1b** were dissolved in anhydrous THF (50 mL) and the solution was added to the  $\text{LiAlH}_4$  suspension. The reaction mixture was refluxed overnight. After cooling to room temperature, deionized water (20 mL) was added and the mixture was poured into a 10 % HCl solution (65 mL) and which then was stirred for 5 h. The resulting yellow precipitate was filtered off, washed with  $\text{CHCl}_3$  and dried under ambient conditions (yield: 1.43 g, 93 %).

$^1\text{H}$  NMR (600 MHz,  $(\text{CD}_3)_2\text{SO}$ ):  $\delta$  7.64 (s, 4H, H1), 7.37 (d,  $J=6.0$  Hz, 2H, H4), 6.95 (d,  $J=6.0$  Hz, 2H, H5), 4.64 (s, 4H, H7) ppm.

$^{13}\text{C}$  NMR (151 MHz,  $(\text{CD}_3)_2\text{SO}$ ):  $\delta$  146.3 (C6), 141.6 (C3), 132.9 (C2), 125.6 (C1), 125.4 (C5), 123.2 (C4), 58.5 (C7) ppm.

IR (ATR,  $\text{cm}^{-1}$ ):  $\nu$  3280, 2952, 2870, 1717, 1286, 1109, 768.

Elemental analysis:  $\text{C}_{16}\text{H}_{14}\text{O}_2\text{S}_2$  (302.41 g/mol)

Calculated : C: 63.55 % H: 4.67 % S: 21.21 %

Found : C: 63.31 % H: 4.62 % S: 21.01 %

### 5,5'-(2,5-Dimethyl-1,4-phenylene)bis(thiophene-5,2-diyl)dimethanol (2c)

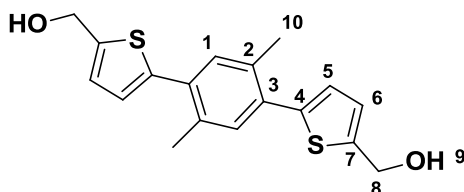

LiAlH<sub>4</sub> (11.06 mmol, 0.41 g) was suspended in anhydrous THF (15 mL) under a nitrogen atmosphere. In another flask, 2.60 g (5.53 mmol) of **2b** were dissolved in anhydrous THF (50 mL) and the solution was added to the LiAlH<sub>4</sub> suspension. The reaction mixture was refluxed overnight. After cooling to room temperature, deionized water (20 mL) was added and the mixture was poured into a 10.00 % HCl solution (65 mL) and stirred for 5h. Aqueous mixture was extracted with dichloromethane. After stripping off the dichloromethane, obtained oily substance washed with pentane, leading to a yellow precipitate which was filtered off and dried under ambient conditions (yield: 1.63 g, 89 %).

<sup>1</sup>H NMR (400 MHz, CDCl<sub>3</sub>): δ 7.30 (s, 2H, H1), 7.00 (d, *J*= 4.0 Hz, 2H, H5), 6.95 (d, *J*= 4.0 Hz, 2H, H6), 4.84 (s, 4H, H8), 2.41 (s, 6H, H10), 2.25 (s, 2H, H9) ppm.

<sup>13</sup>C NMR (101 MHz, CDCl<sub>3</sub>): δ 143.8 (C7), 143.1 (C4), 133.6 (C2), 133.4 (C3), 132.7 (C1), 126.4 (C6), 125.8 (C5), 60.2 (C8), 20.7 (C10) ppm.

IR (ATR, cm<sup>-1</sup>): ν 3264, 2922, 2861, 1002, 811, 734.

Elemental analysis: C<sub>18</sub>H<sub>18</sub>O<sub>2</sub>S<sub>2</sub> (330.46 g/mol)

|            |   |            |           |            |
|------------|---|------------|-----------|------------|
| Calculated | : | C: 65.42 % | H: 5.49 % | S: 19.41 % |
| Found      | : | C: 65.61 % | H: 5.64 % | S: 18.75 % |

### 5,5',5''-(Nitrilotris(benzene-4,1-diyl))tris(thiophene-5,2-diyl)trimethanol (**3c**)

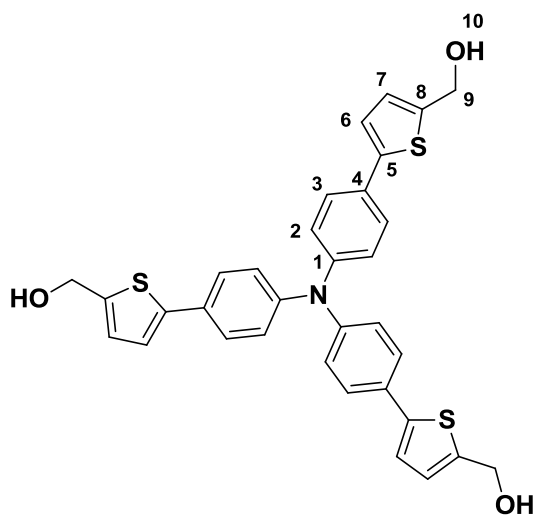

LiAlH<sub>4</sub> (5.49 mmol, 0.21 g) was suspended in anhydrous THF (15 mL) under a nitrogen atmosphere. In another flask, 1.45 (1.83 mmol) of **3b** were dissolved in anhydrous THF (50 mL) and the solution was added to the LiAlH<sub>4</sub> suspension. The reaction mixture was refluxed overnight. After cooling to room temperature, deionized water (20 mL) was added and the mixture was poured into a 10.00 % HCl solution (60 mL) and stirred for 5 h. The resulting red precipitate was filtered off, washed with CHCl<sub>3</sub> and dried under ambient conditions (yield: 0.75 g, 70 %).

<sup>1</sup>H NMR (600 MHz, (CD<sub>3</sub>)<sub>2</sub>SO): δ 7.57 (d, *J*= 8.0 Hz, 6H, H2), 7.26 (d, *J*= 3.0 Hz, 3H, H6), 7.07 (d, *J*= 8.0 Hz, 6H, H3), 6.93 (d, *J*= 3.0 Hz, 3H, H7), 4.62 (s, 6H, H9) ppm.

$^{13}\text{C}$  NMR (151 MHz,  $(\text{CD}_3)_2\text{SO}$ ):  $\delta$  145.8 (C1), 145.5 (C8), 141.8 (C5), 129.0 (C7), 126.4 (C4), 125.3 (C3), 124.2 (C2), 122.4 (C6), 58.4 (C9) ppm.

IR (ATR,  $\text{cm}^{-1}$ ):  $\nu$  3027, 2924, 1506, 1264, 795, 687.

Elemental analysis:  $\text{C}_{33}\text{H}_{27}\text{NO}_3\text{S}_3$  (581.77 g/mol)

Calculated : C: 68.13 % H: 4.68 % N: 2.41 % S: 16.53 %

Found : C: 68.49 % H: 4.67 % N: 2.37 % S: 16.26 %

### 1,4-Bis(5-chloromethyl)thiophen-2-yl)benzene (1d)

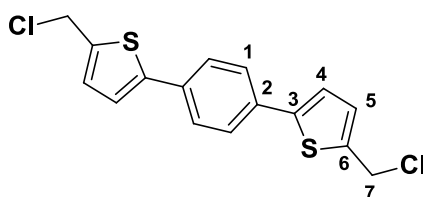

Oxalyl chloride (13.0 mmol, 1.68 g) was added to anhydrous THF (35 mL), the reaction medium was cooled down to 0 °C and DMF (13.0 mmol, 0.95 g) was dropwise added to the solution. The reaction mixture was warmed up slowly and stirred at room temperature for additional 15 min. The reaction mixture was again cooled down to 0°C, **1c** (1.65 mmol, 0.50 g) was added and the solution was stirred overnight. After stripping off the volatiles,  $\text{H}_2\text{O}$  was added. The resulting yellow precipitate was filtered off and washed with  $\text{H}_2\text{O}$  (yield: 0.50 g, 89 %).

$^1\text{H}$  NMR (600 MHz,  $(\text{CD}_3)_2\text{SO}$ ):  $\delta$  7.69 (s, 4H, H1), 7.44 (d,  $J=3.5$  Hz, 2H, H4), 7.22 (d,  $J=3.5$  Hz, 2H, H5), 5.07 (s, 4H, H7) ppm.

$^{13}\text{C}$  NMR (151 MHz,  $(\text{CD}_3)_2\text{SO}$ ):  $\delta$  144.2 (C3), 139.9 (C6), 132.8 (C2), 129.9 (C5), 126.0 (C1), 123.7 (C4), 40.9 (C7) ppm.

IR (ATR,  $\text{cm}^{-1}$ ):  $\nu$  2974, 2954, 2865, 697, 660.

Elemental analysis:  $\text{C}_{16}\text{H}_{12}\text{Cl}_2\text{S}_2$  (339.30 g/mol)

Calculated : C: 56.64 % H: 3.56 % S: 18.90 %

Found : C: 57.56 % H: 3.91 % S: 18.23 %

### 5,5'-(2,5-Dimethyl-1,4-phenylene)bis(2-(chloromethyl)thiophene) (2d)

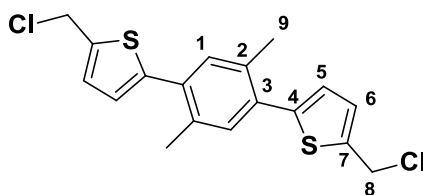

Oxalyl chloride (35.00 mmol, 4.52 g) was added to anhydrous THF (75 mL), the reaction medium was cooled down to 0 °C and DMF (35.00 mmol, 2.56 g) was added dropwise to the solution. The reaction mixture was warmed up slowly and stirred at room temperature for additional 15 min. The reaction mixture was again cooled down to 0 °C. **2c** (4.45 mmol, 1.47 g) was added and the solution was stirred overnight. After stripping off the volatiles, deionized water was added. The resulting yellow precipitate was filtered and washed with deionized water (yield: 1.38 g, 84 %).

**<sup>1</sup>H NMR (600 MHz, CDCl<sub>3</sub>):** δ 7.35 (s, 2H, H1), 7.23 (d, *J*= 3.8 Hz, 2H, H5), 7.10 (d, *J*= 3.8 Hz, 2H, H6), 5.07 (s, 4H, H8), 2.38 (s, 6H, H9) ppm.

**<sup>13</sup>C NMR (151 MHz, CDCl<sub>3</sub>):** δ 143.2 (C7), 140.2 (C4), 132.9 (C2), 132.7 (C3), 132.2 (C1), 128.9 (C6), 126.7 (C5), 40.8 (C8), 20.3 (C9) ppm.

IR (ATR, cm<sup>-1</sup>): ν 2954, 2922, 2853, 1664, 1450, 1227, 802, 669.

**Elemental analysis:** C<sub>18</sub>H<sub>16</sub>Cl<sub>2</sub>S<sub>2</sub> (367.36 g/mol)

|                   |   |                   |                  |                   |
|-------------------|---|-------------------|------------------|-------------------|
| <b>Calculated</b> | : | <b>C:</b> 58.85 % | <b>H:</b> 4.39 % | <b>S:</b> 17.46 % |
| <b>Found</b>      | : | <b>C:</b> 59.57 % | <b>H:</b> 4.70 % | <b>S:</b> 16.04 % |

### Tris(4-(5-(chloromethyl)thiophen-2-yl)phenyl)amine (**3d**)

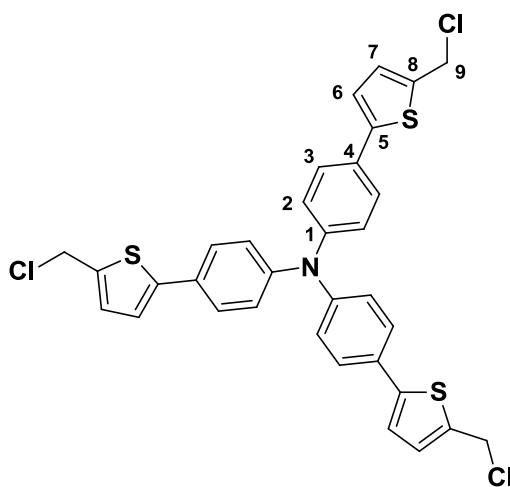

Oxalyl chloride (10.31 mmol, 1.31 g) was added to anhydrous THF (30 mL), the solution was cooled down to 0 °C and DMF (10.31 mmol, 0.75 g) was added dropwise to the solution. The reaction mixture was warmed up slowly and stirred at room temperature for additional 15 min. The reaction mixture was again cooled down to 0 °C. **3c** (0.50 g, 0.86 mmol) was added and the mixture was stirred overnight. After stripping off the volatiles, deionized water was added. The resulting dark red precipitate was filtered and washed with deionized water (yield: 0.45 g, 81 %).

**<sup>1</sup>H NMR (400 MHz, (CD<sub>3</sub>)<sub>2</sub>SO):** δ 7.57 (d, *J*= 7.6 Hz, 6H, H2), 7.28 (s, 3H, H6), 7.17 (s, 3H, H7), 7.06 (d, *J*= 7.6 Hz, 6H, H3), 5.03 (s, 6H, H9) ppm.

$^{13}\text{C}$  NMR (101 MHz,  $(\text{CD}_3)_2\text{SO}$ ):  $\delta$  146.1 (C1), 144.6 (C8), 139.0 (C5), 129.8 (C7), 128.4 (C4), 126.7 (C3), 124.2 (C2), 122.7 (C6), 41.1 (C9) ppm.

IR (ATR,  $\text{cm}^{-1}$ ):  $\nu$  3027, 2924, 1507, 1255, 796, 657.

Elemental analysis:  $\text{C}_{33}\text{H}_{24}\text{Cl}_3\text{NS}_3$  (637.10 g/mol)

Calculated : C: 62.21 % H: 3.80 % N: 2.20 % S: 15.10 %

Found : C: 61.78 % H: 4.24 % N: 2.01 % S: 15.21 %

### Tetraethyl-((5,5'-(1,4-phenylene)bis(thiophene-5,2-diyl)) bis(methylene))bis(phosphonate) (1e)

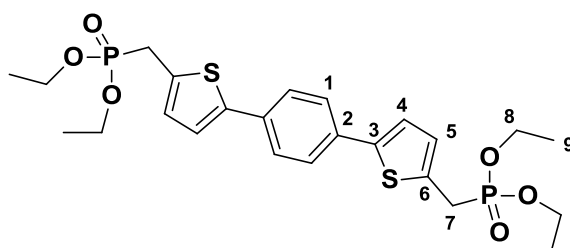

0.50 g (1.47 mmol) of **1d** was placed in a Schlenk tube, 7.58 g (44.10 mmol) of triethyl phosphite were added and the reaction medium was heated to 120 °C for 72 h with continuous stirring. All volatiles were removed *in vacuo*. The remaining yellow solid was washed several times with *n*-pentane and dried at ambient conditions (yield: 0.43 g, 54 %).

$^1\text{H}$  NMR (400 MHz,  $(\text{CD}_3)_2\text{SO}$ ):  $\delta$  7.63 (s, 4H, H1), 7.40 (d,  $J=3.6$  Hz, 2H, H4), 6.97 (t,  $J=3.6$  Hz, 2H, H5), 4.02 (dq,  $^3J_{\text{PH}}=14.0$  Hz,  $^3J_{\text{HH}}=7.0$  Hz, 8H, H8), 3.52 (d,  $^2J_{\text{PH}}=20.8$  Hz, 4H, H7), 1.22 (t,  $J=7.0$  Hz, 12H, H9) ppm.

$^{13}\text{C}$  NMR (101 MHz,  $(\text{CD}_3)_2\text{SO}$ ):  $\delta$  141.7 (d,  $^5J_{\text{PC}}=4.2$  Hz, C3), 133.3 (d,  $^2J_{\text{PC}}=10.8$  Hz, C6), 132.7 (s, C2), 128.8 (d,  $^3J_{\text{PC}}=9.1$  Hz, C5), 125.6 (s, C1), 123.5 (d,  $^4J_{\text{PC}}=3.4$  Hz, C4), 61.7 (d,  $^2J_{\text{PC}}=6.5$  Hz, C8), 27.1 (d,  $^1J_{\text{PC}}=139.9$  Hz, C7), 16.2 (d,  $^3J_{\text{PC}}=5.6$  Hz, C9) ppm.

$^{31}\text{P}$  NMR (162 MHz,  $(\text{CD}_3)_2\text{SO}$ ):  $\delta$  24.35 ppm.

IR (ATR,  $\text{cm}^{-1}$ ):  $\nu$  3069, 2931, 1443, 1163, 1021, 952, 712.

Elemental analysis:  $\text{C}_{24}\text{H}_{32}\text{O}_6\text{P}_2\text{S}_2$  (542.58 g/mol)

Calculated : C: 53.13 % H: 5.94 % S: 11.82 %

Found : C: 54.53 % H: 5.47 % S: 12.97 %



**Tetraethyl-((5,5`-(2,5-dimethyl-1,4-phenylene)bis(thiophene-5,2-diyl))bis(methylene))bis(phosphonate) (2e)**

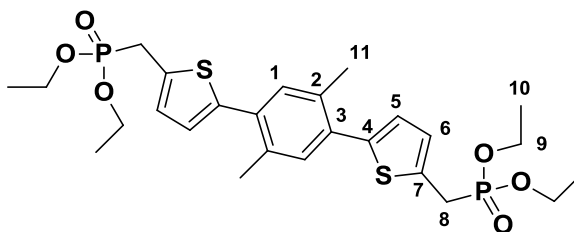

0.50 g (1.36 mmol) **2d** was placed in a Schlenk tube, 6.81 g (41.00 mmol) of triethyl phosphite were added and the reaction mixture was heated to 120 °C for 72 h under continuous stirring. All volatiles were removed *in vacuo*. The remaining yellow solid was washed several times with pentane and dried at ambient conditions (yield: 0.40 g, 51 %).

**<sup>1</sup>H NMR (400 MHz, (CD<sub>3</sub>)<sub>2</sub>SO):** δ 7.31 (s, 2H, H1), 7.09 (d, *J* = 3.6 Hz, 2H, H5), 6.99 (t, *J* = 3.6 Hz, 2H, H6), 4.02 (dq, <sup>3</sup>*J*<sub>PH</sub> = 14.1, <sup>2</sup>*J*<sub>HH</sub> = 7.1 Hz, 8H, H9), 3.52 (d, <sup>2</sup>*J*<sub>PH</sub> = 20.8 Hz, 4H, H8), 2.38 (s, 6H, H11), 1.22 (t, *J* = 7.0 Hz, 12H, H10) ppm.

**<sup>13</sup>C NMR (151 MHz, (CD<sub>3</sub>)<sub>2</sub>SO):** δ 140.7 (d, <sup>5</sup>*J*<sub>PC</sub> = 3.5 Hz, C4), 133.5 (d, <sup>2</sup>*J*<sub>PC</sub> = 10.2 Hz, C7), 132.7 (s, C2), 132.7 (s, C3), 132.0 (s, C1), 127.8 (d, <sup>3</sup>*J*<sub>PC</sub> = 9.0 Hz, C6), 126.6 (d, <sup>4</sup>*J*<sub>PC</sub> = 2.3 Hz, C5), 61.7 (d, <sup>2</sup>*J*<sub>PC</sub> = 6.2 Hz, C9), 26.8 (d, <sup>1</sup>*J*<sub>PC</sub> = 135.9 Hz, C8), 20.4 (s, C11), 16.2 (d, <sup>3</sup>*J*<sub>PC</sub> = 5.7 Hz, C10) ppm.

**<sup>31</sup>P NMR (162 MHz, (CD<sub>3</sub>)<sub>2</sub>SO):** δ 24.48 ppm.

**IR (ATR, cm<sup>-1</sup>):** ν 3062, 2905, 1436, 1246, 1182, 1151, 1019, 959, 699.

**Elemental analysis:** C<sub>26</sub>H<sub>36</sub>O<sub>6</sub>P<sub>2</sub>S<sub>2</sub> (570.64 g/mol)

|                   |   |                   |                  |                   |
|-------------------|---|-------------------|------------------|-------------------|
| <b>Calculated</b> | : | <b>C:</b> 54.72 % | <b>H:</b> 6.36 % | <b>S:</b> 11.24 % |
| <b>Found</b>      | : | <b>C:</b> 54.62 % | <b>H:</b> 6.25 % | <b>S:</b> 11.23 % |

**Hexaethyl((5,5',5''-(nitrotris(benzene-4,1-diyl))tris(thiophene-5,2-diyl))tris(methylene)tris(phosphonate) (3e)**

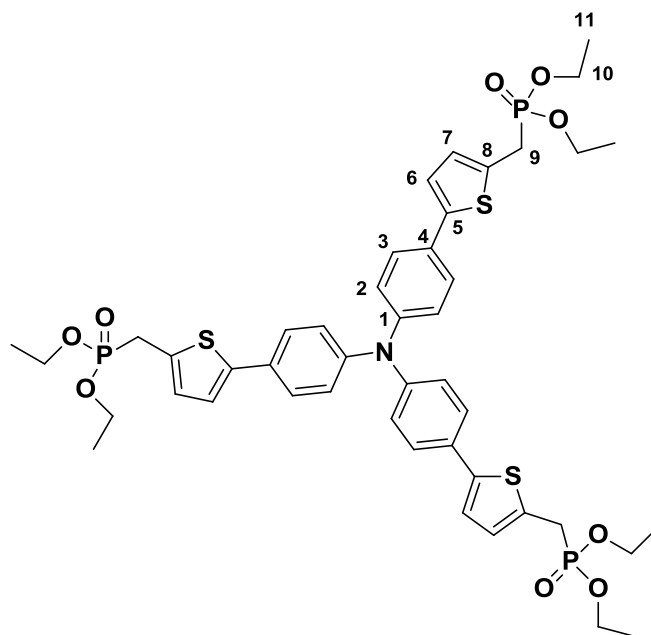

0.20 g (0.31 mmol) of **3d** was placed in a Schlenk tube, 3.39 g (13.95 mmol) of triethyl phosphite were added and the reaction medium was heated to 120 °C for 72 h under continuous stirring. All volatiles were removed *in vacuo*. The remaining yellow solid was washed several times with pentane and dried under vacuum (yield: 0.16 g, 55 %).

**<sup>1</sup>H NMR (400 MHz, (CD<sub>3</sub>)<sub>2</sub>SO):** δ 7.55 (d, *J* = 8.5 Hz, 6H, H2), 7.27 (d, *J* = 3.4 Hz, 3H, H6), 7.07 (d, *J* = 8.5 Hz, 6H, H3), 6.95 – 6.93 (m, 3H, H7), 4.04 – 3.96 (m, 12H, H10), 3.50 (d, <sup>2</sup>*J*<sub>PH</sub> = 20.8 Hz, 6H, H9), 1.21 (t, *J* = 7.1 Hz, 18H, H11) ppm.

**<sup>13</sup>C NMR (101 MHz, (CD<sub>3</sub>)<sub>2</sub>SO):** δ 145.8 (C1), 142.0 (C8), 136.8 (C5), 132.6 (C5), 128.7 (C4), 126.3 (C3), 124.2 (C2), 122.7 (C6), 61.7 (d, <sup>2</sup>*J*<sub>PC</sub> = 6.4 Hz, C10), 27.0 (d, <sup>1</sup>*J*<sub>PC</sub> = 139.6 Hz, C9), 16.3 (d, <sup>3</sup>*J*<sub>PC</sub> = 5.6 Hz, C11) ppm.

IR (ATR, cm<sup>-1</sup>): ν 2958, 2541, 1658, 1533, 1441, 1263, 734.

**Elemental analysis:** C<sub>45</sub>H<sub>54</sub>NO<sub>9</sub>P<sub>3</sub>S<sub>3</sub> (942.03 g/mol)

|                   |   |                   |                  |                  |                   |
|-------------------|---|-------------------|------------------|------------------|-------------------|
| <b>Calculated</b> | : | <b>C: 57.37 %</b> | <b>H: 5.78 %</b> | <b>N: 1.49 %</b> | <b>S: 10.21 %</b> |
| <b>Found</b>      | : | <b>C: 58.96 %</b> | <b>H: 4.91 %</b> | <b>N: 1.80 %</b> | <b>S: 12.09 %</b> |

## Crystallographic data

### Dibutyl-5,5'-(1,4-phenylene)bis(thiophene-2-carboxylate) (1b)

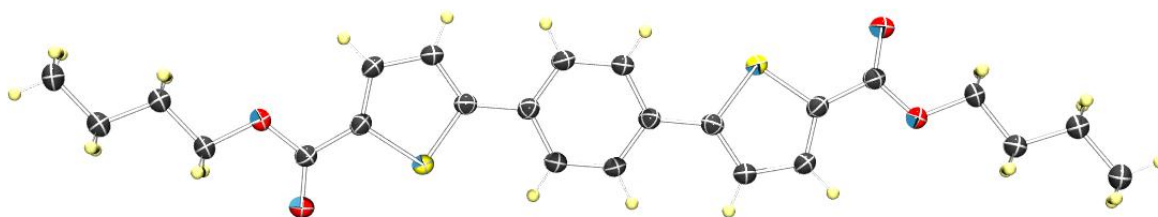

|                                                                                                                                                                                                                                                                                                                       | <b>1b</b>                                                     |
|-----------------------------------------------------------------------------------------------------------------------------------------------------------------------------------------------------------------------------------------------------------------------------------------------------------------------|---------------------------------------------------------------|
| Empirical formula                                                                                                                                                                                                                                                                                                     | C <sub>24</sub> H <sub>26</sub> O <sub>4</sub> S <sub>2</sub> |
| Formula weight [g × mol <sup>-1</sup> ]                                                                                                                                                                                                                                                                               | 442.57                                                        |
| Crystal size                                                                                                                                                                                                                                                                                                          | 0.31 × 0.12 × 0.06 mm <sup>3</sup>                            |
| T [K]                                                                                                                                                                                                                                                                                                                 | 150(2)                                                        |
| λ [Å]                                                                                                                                                                                                                                                                                                                 | 1.54184                                                       |
| Crystal system                                                                                                                                                                                                                                                                                                        | triclinic                                                     |
| Space group                                                                                                                                                                                                                                                                                                           | P-1                                                           |
| a [Å]                                                                                                                                                                                                                                                                                                                 | 8.5601(5)                                                     |
| b [Å]                                                                                                                                                                                                                                                                                                                 | 11.8606(9)                                                    |
| c [Å]                                                                                                                                                                                                                                                                                                                 | 12.1527(6)                                                    |
| α [°]                                                                                                                                                                                                                                                                                                                 | 110.052(6)                                                    |
| β [°]                                                                                                                                                                                                                                                                                                                 | 90.591(5)                                                     |
| γ [°]                                                                                                                                                                                                                                                                                                                 | 108.776(6)                                                    |
| V [Å <sup>3</sup> ]                                                                                                                                                                                                                                                                                                   | 1087.22(14)                                                   |
| Z                                                                                                                                                                                                                                                                                                                     | 2                                                             |
| ρ <sub>calc.</sub> [g × cm <sup>-3</sup> ]                                                                                                                                                                                                                                                                            | 1.352                                                         |
| μ [mm <sup>-1</sup> ]                                                                                                                                                                                                                                                                                                 | 2.452                                                         |
| θ-range [°]                                                                                                                                                                                                                                                                                                           | 3.91 to 62.65                                                 |
| Reflections collected                                                                                                                                                                                                                                                                                                 | 6517                                                          |
| Independent reflections                                                                                                                                                                                                                                                                                               | 3424 [R(int) = 0.0226]                                        |
| Data/restraints/parameters                                                                                                                                                                                                                                                                                            | 3424 / 0 / 273                                                |
| Final R indices [I > 2σ(I)] <sup>[a]</sup>                                                                                                                                                                                                                                                                            | R1 = 0.0362, ωR2 = 0.1044                                     |
| R indices (all data)                                                                                                                                                                                                                                                                                                  | R1 = 0.0416, ωR2 = 0.1073                                     |
| Goof <sup>[b]</sup>                                                                                                                                                                                                                                                                                                   | 1.069                                                         |
| Δρ <sub>max./min.</sub> [e Å <sup>-3</sup> ]                                                                                                                                                                                                                                                                          | 0.350 and -0.178                                              |
| [a] R <sub>1</sub> = Σ  F <sub>o</sub>  - F <sub>c</sub>   /Σ F <sub>o</sub>  , ωR <sub>2</sub> = [Σω(F <sub>o</sub> <sup>2</sup> -F <sub>c</sub> <sup>2</sup> )/Σω(F <sub>o</sub> <sup>2</sup> )] <sup>1/2</sup> . [b] Goof = [Σω(F <sub>o</sub> <sup>2</sup> -F <sub>c</sub> <sup>2</sup> )/(n-p)] <sup>1/2</sup> . |                                                               |

Bond lengths [Å] and angles [°] for **1b**.

|              |            |                   |            |                     |            |
|--------------|------------|-------------------|------------|---------------------|------------|
| C(1)-C(2)    | 1.525(3)   | C(23)-H(23A)      | 0.9900     | C(14)-C(13)-C(12)   | 117.90(16) |
| C(1)-H(1A)   | 0.9800     | C(23)-H(23B)      | 0.9900     | C(14)-C(13)-C(16)   | 120.42(15) |
| C(1)-H(1B)   | 0.9800     | C(24)-H(24A)      | 0.9800     | C(12)-C(13)-C(16)   | 121.67(15) |
| C(1)-H(1C)   | 0.9800     | C(24)-H(24B)      | 0.9800     | C(15)-C(14)-C(13)   | 121.26(16) |
| C(2)-C(3)    | 1.515(3)   | C(24)-H(24C)      | 0.9800     | C(15)-C(14)-H(14)   | 119.4      |
| C(2)-H(2A)   | 0.9900     | C(2)-C(1)-H(1A)   | 109.5      | C(13)-C(14)-H(14)   | 119.4      |
| C(2)-H(2B)   | 0.9900     | C(2)-C(1)-H(1B)   | 109.5      | C(14)-C(15)-C(10)   | 120.95(17) |
| C(3)-C(4)    | 1.509(2)   | H(1A)-C(1)-H(1B)  | 109.5      | C(14)-C(15)-H(15)   | 119.5      |
| C(3)-H(3A)   | 0.9900     | C(2)-C(1)-H(1C)   | 109.5      | C(10)-C(15)-H(15)   | 119.5      |
| C(3)-H(3B)   | 0.9900     | H(1A)-C(1)-H(1C)  | 109.5      | C(17)-C(16)-C(13)   | 128.33(16) |
| C(4)-O(1)    | 1.451(2)   | H(1B)-C(1)-H(1C)  | 109.5      | C(17)-C(16)-S(2)    | 110.41(13) |
| C(4)-H(4A)   | 0.9900     | C(3)-C(2)-C(1)    | 112.10(15) | C(13)-C(16)-S(2)    | 121.26(13) |
| C(4)-H(4B)   | 0.9900     | C(3)-C(2)-H(2A)   | 109.2      | C(16)-C(17)-C(18)   | 113.21(16) |
| C(5)-O(2)    | 1.204(2)   | C(1)-C(2)-H(2A)   | 109.2      | C(16)-C(17)-H(17)   | 123.4      |
| C(5)-O(1)    | 1.347(2)   | C(3)-C(2)-H(2B)   | 109.2      | C(18)-C(17)-H(17)   | 123.4      |
| C(5)-C(6)    | 1.470(2)   | C(1)-C(2)-H(2B)   | 109.2      | C(19)-C(18)-C(17)   | 112.93(16) |
| C(6)-C(7)    | 1.363(2)   | H(2A)-C(2)-H(2B)  | 107.9      | C(19)-C(18)-H(18)   | 123.5      |
| C(6)-S(1)    | 1.7203(17) | C(4)-C(3)-C(2)    | 112.32(15) | C(17)-C(18)-H(18)   | 123.5      |
| C(7)-C(8)    | 1.401(3)   | C(4)-C(3)-H(3A)   | 109.1      | C(18)-C(19)-C(20)   | 129.63(16) |
| C(7)-H(7)    | 0.9500     | C(2)-C(3)-H(3A)   | 109.1      | C(18)-C(19)-S(2)    | 111.60(14) |
| C(8)-C(9)    | 1.382(2)   | C(4)-C(3)-H(3B)   | 109.1      | C(20)-C(19)-S(2)    | 118.76(13) |
| C(8)-H(8)    | 0.9500     | C(2)-C(3)-H(3B)   | 109.1      | O(4)-C(20)-O(3)     | 124.19(16) |
| C(9)-C(10)   | 1.464(3)   | H(3A)-C(3)-H(3B)  | 107.9      | O(4)-C(20)-C(19)    | 124.95(16) |
| C(9)-S(1)    | 1.7259(18) | O(1)-C(4)-C(3)    | 107.52(14) | O(3)-C(20)-C(19)    | 110.86(14) |
| C(10)-C(11)  | 1.398(2)   | O(1)-C(4)-H(4A)   | 110.2      | O(3)-C(21)-C(22)    | 106.72(14) |
| C(10)-C(15)  | 1.403(2)   | C(3)-C(4)-H(4A)   | 110.2      | O(3)-C(21)-H(21A)   | 110.4      |
| C(11)-C(12)  | 1.379(2)   | O(1)-C(4)-H(4B)   | 110.2      | C(22)-C(21)-H(21A)  | 110.4      |
| C(11)-H(11)  | 0.9500     | C(3)-C(4)-H(4B)   | 110.2      | O(3)-C(21)-H(21B)   | 110.4      |
| C(12)-C(13)  | 1.404(2)   | H(4A)-C(4)-H(4B)  | 108.5      | C(22)-C(21)-H(21B)  | 110.4      |
| C(12)-H(12)  | 0.9500     | O(2)-C(5)-O(1)    | 123.90(16) | H(21A)-C(21)-H(21B) | 108.6      |
| C(13)-C(14)  | 1.395(2)   | O(2)-C(5)-C(6)    | 124.29(16) | C(21)-C(22)-C(23)   | 110.93(15) |
| C(13)-C(16)  | 1.467(2)   | O(1)-C(5)-C(6)    | 111.81(14) | C(21)-C(22)-H(22A)  | 109.5      |
| C(14)-C(15)  | 1.375(3)   | C(7)-C(6)-C(5)    | 131.35(16) | C(23)-C(22)-H(22A)  | 109.5      |
| C(14)-H(14)  | 0.9500     | C(7)-C(6)-S(1)    | 111.35(13) | C(21)-C(22)-H(22B)  | 109.5      |
| C(15)-H(15)  | 0.9500     | C(5)-C(6)-S(1)    | 117.30(13) | C(23)-C(22)-H(22B)  | 109.5      |
| C(16)-C(17)  | 1.377(2)   | C(6)-C(7)-C(8)    | 113.15(15) | H(22A)-C(22)-H(22B) | 108.0      |
| C(16)-S(2)   | 1.7292(17) | C(6)-C(7)-H(7)    | 123.4      | C(22)-C(23)-C(24)   | 112.64(16) |
| C(17)-C(18)  | 1.406(3)   | C(8)-C(7)-H(7)    | 123.4      | C(22)-C(23)-H(23A)  | 109.1      |
| C(17)-H(17)  | 0.9500     | C(9)-C(8)-C(7)    | 113.11(16) | C(24)-C(23)-H(23A)  | 109.1      |
| C(18)-C(19)  | 1.359(2)   | C(9)-C(8)-H(8)    | 123.4      | C(22)-C(23)-H(23B)  | 109.1      |
| C(18)-H(18)  | 0.9500     | C(7)-C(8)-H(8)    | 123.4      | C(24)-C(23)-H(23B)  | 109.1      |
| C(19)-C(20)  | 1.473(2)   | C(8)-C(9)-C(10)   | 129.05(16) | H(23A)-C(23)-H(23B) | 107.8      |
| C(19)-S(2)   | 1.7205(17) | C(8)-C(9)-S(1)    | 110.37(14) | C(23)-C(24)-H(24A)  | 109.5      |
| C(20)-O(4)   | 1.205(2)   | C(10)-C(9)-S(1)   | 120.58(13) | C(23)-C(24)-H(24B)  | 109.5      |
| C(20)-O(3)   | 1.347(2)   | C(11)-C(10)-C(15) | 117.94(16) | H(24A)-C(24)-H(24B) | 109.5      |
| C(21)-O(3)   | 1.448(2)   | C(11)-C(10)-C(9)  | 120.91(15) | C(23)-C(24)-H(24C)  | 109.5      |
| C(21)-C(22)  | 1.513(2)   | C(15)-C(10)-C(9)  | 121.13(16) | H(24A)-C(24)-H(24C) | 109.5      |
| C(21)-H(21A) | 0.9900     | C(12)-C(11)-C(10) | 121.01(16) | H(24B)-C(24)-H(24C) | 109.5      |
| C(21)-H(21B) | 0.9900     | C(12)-C(11)-H(11) | 119.5      | C(5)-O(1)-C(4)      | 115.21(13) |
| C(22)-C(23)  | 1.516(3)   | C(10)-C(11)-H(11) | 119.5      | C(20)-O(3)-C(21)    | 115.70(13) |
| C(22)-H(22A) | 0.9900     | C(11)-C(12)-C(13) | 120.94(16) | C(6)-S(1)-C(9)      | 92.02(8)   |
| C(22)-H(22B) | 0.9900     | C(11)-C(12)-H(12) | 119.5      | C(19)-S(2)-C(16)    | 91.85(8)   |
| C(23)-C(24)  | 1.520(3)   | C(13)-C(12)-H(12) | 119.5      |                     |            |

**Dibutyl-5,5'-(2,5-dimethyl-1,4-phenylene)bis(thiophene-2-carboxylate) (2b)**

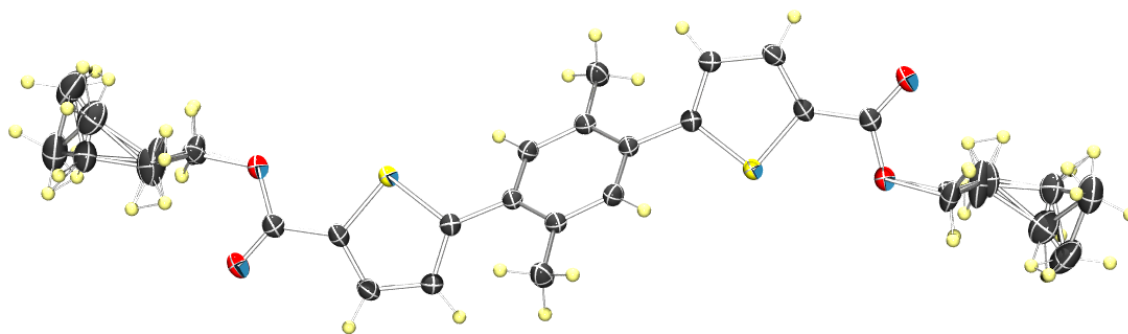

|                                                                                                                                                                                                                                                                                                                       | <b>2b</b>                                                     |
|-----------------------------------------------------------------------------------------------------------------------------------------------------------------------------------------------------------------------------------------------------------------------------------------------------------------------|---------------------------------------------------------------|
| Empirical formula                                                                                                                                                                                                                                                                                                     | C <sub>26</sub> H <sub>30</sub> O <sub>4</sub> S <sub>2</sub> |
| Formula weight [g × mol <sup>-1</sup> ]                                                                                                                                                                                                                                                                               | 470.62                                                        |
| Crystal size                                                                                                                                                                                                                                                                                                          | 0.14 × 0.08 × 0.07 mm <sup>3</sup>                            |
| T [K]                                                                                                                                                                                                                                                                                                                 | 150(2)                                                        |
| λ [Å]                                                                                                                                                                                                                                                                                                                 | 1.54184                                                       |
| Crystal system                                                                                                                                                                                                                                                                                                        | monoclinic                                                    |
| Space group                                                                                                                                                                                                                                                                                                           | P2 <sub>1</sub> /n                                            |
| a [Å]                                                                                                                                                                                                                                                                                                                 | 12.8645(3)                                                    |
| b [Å]                                                                                                                                                                                                                                                                                                                 | 6.0509(1)                                                     |
| c [Å]                                                                                                                                                                                                                                                                                                                 | 15.8520(4)                                                    |
| α [°]                                                                                                                                                                                                                                                                                                                 | 90                                                            |
| β [°]                                                                                                                                                                                                                                                                                                                 | 96.708(2)                                                     |
| γ [°]                                                                                                                                                                                                                                                                                                                 | 90                                                            |
| V [Å <sup>3</sup> ]                                                                                                                                                                                                                                                                                                   | 1225.50(5)                                                    |
| Z                                                                                                                                                                                                                                                                                                                     | 2                                                             |
| ρ <sub>calc.</sub> [g × cm <sup>-3</sup> ]                                                                                                                                                                                                                                                                            | 1.275                                                         |
| μ [mm <sup>-1</sup> ]                                                                                                                                                                                                                                                                                                 | 2.205                                                         |
| θ-range [°]                                                                                                                                                                                                                                                                                                           | 4.19 to 62.62                                                 |
| Reflections collected                                                                                                                                                                                                                                                                                                 | 7561                                                          |
| Independent reflections                                                                                                                                                                                                                                                                                               | 1949 [R(int) = 0.0221]                                        |
| Data/restraints/parameters                                                                                                                                                                                                                                                                                            | 1949 / 120 / 186                                              |
| Final R indices [I > 2σ(I)] <sup>[a]</sup>                                                                                                                                                                                                                                                                            | R1 = 0.0263, ωR2 = 0.0732                                     |
| R indices (all data)                                                                                                                                                                                                                                                                                                  | R1 = 0.0309, ωR2 = 0.0745                                     |
| GooF <sup>[b]</sup>                                                                                                                                                                                                                                                                                                   | 1.059                                                         |
| Δρ <sub>max./min.</sub> [e Å <sup>-3</sup> ]                                                                                                                                                                                                                                                                          | 0.264 and -0.192                                              |
| [a] R <sub>1</sub> = Σ  F <sub>o</sub>  - F <sub>c</sub>   /Σ F <sub>o</sub>  , ωR <sub>2</sub> = [Σα(F <sub>o</sub> <sup>2</sup> -F <sub>c</sub> <sup>2</sup> )/Σα(F <sub>o</sub> <sup>2</sup> )] <sup>1/2</sup> . [b] GooF = [Σα(F <sub>o</sub> <sup>2</sup> -F <sub>c</sub> <sup>2</sup> )/(n-p)] <sup>1/2</sup> . |                                                               |

Bond lengths [Å] and angles [°] for **2b**.

|                  |            |                   |            |                     |            |
|------------------|------------|-------------------|------------|---------------------|------------|
| C(1)-C(2)        | 1.502(8)   | C(4)-C(3)-H(3A)   | 110.8      | C(6)-S(1)-C(9)      | 92.05(7)   |
| C(1)-H(1A)       | 0.9800     | C(2)-C(3)-H(3A)   | 110.8      | C(12)-C(10)-C(11)   | 119.54(12) |
| C(1)-H(1B)       | 0.9800     | C(4)-C(3)-H(3B)   | 110.8      | C(12)-C(10)-C(9)    | 118.34(12) |
| C(1)-H(1C)       | 0.9800     | C(2)-C(3)-H(3B)   | 110.8      | C(11)-C(10)-C(9)    | 122.12(12) |
| C(2)-C(3)        | 1.624(12)  | H(3A)-C(3)-H(3B)  | 108.9      | C(12)#1-C(11)-C(10) | 117.29(12) |
| C(2)-H(2A)       | 0.9900     | O(1)-C(4)-C(3)    | 120.2(12)  | C(12)#1-C(11)-C(13) | 119.50(12) |
| C(2)-H(2B)       | 0.9900     | O(1)-C(4)-H(4A)   | 107.3      | C(10)-C(11)-C(13)   | 123.20(12) |
| C(3)-C(4)        | 1.518(12)  | C(3)-C(4)-H(4A)   | 107.3      | C(11)#1-C(12)-C(10) | 123.18(12) |
| C(3)-H(3A)       | 0.9900     | O(1)-C(4)-H(4B)   | 107.3      | C(11)#1-C(12)-H(12) | 118.4      |
| C(3)-H(3B)       | 0.9900     | C(3)-C(4)-H(4B)   | 107.3      | C(10)-C(12)-H(12)   | 118.4      |
| C(4)-O(1)        | 1.443(11)  | H(4A)-C(4)-H(4B)  | 106.9      | C(11)-C(13)-H(13A)  | 109.5      |
| C(4)-H(4A)       | 0.9900     | C(2A)-C(1A)-H(1D) | 109.5      | C(11)-C(13)-H(13B)  | 109.5      |
| C(4)-H(4B)       | 0.9900     | C(2A)-C(1A)-H(1E) | 109.5      | H(13A)-C(13)-H(13B) | 109.5      |
| C(1A)-C(2A)      | 1.526(5)   | H(1D)-C(1A)-H(1E) | 109.5      | C(11)-C(13)-H(13C)  | 109.5      |
| C(1A)-H(1D)      | 0.9800     | C(2A)-C(1A)-H(1F) | 109.5      | H(13A)-C(13)-H(13C) | 109.5      |
| C(1A)-H(1E)      | 0.9800     | H(1D)-C(1A)-H(1F) | 109.5      | H(13B)-C(13)-H(13C) | 109.5      |
| C(1A)-H(1F)      | 0.9800     | H(1E)-C(1A)-H(1F) | 109.5      |                     |            |
| C(2A)-C(3A)      | 1.591(8)   | C(1A)-C(2A)-C(3A) | 105.5(5)   |                     |            |
| C(2A)-H(2C)      | 0.9900     | C(1A)-C(2A)-H(2C) | 110.7      |                     |            |
| C(2A)-H(2D)      | 0.9900     | C(3A)-C(2A)-H(2C) | 110.7      |                     |            |
| C(3A)-C(4A)      | 1.518(9)   | C(1A)-C(2A)-H(2D) | 110.7      |                     |            |
| C(3A)-H(3C)      | 0.9900     | C(3A)-C(2A)-H(2D) | 110.7      |                     |            |
| C(3A)-H(3D)      | 0.9900     | H(2C)-C(2A)-H(2D) | 108.8      |                     |            |
| C(4A)-O(1)       | 1.475(7)   | C(4A)-C(3A)-C(2A) | 111.1(7)   |                     |            |
| C(4A)-H(4C)      | 0.9900     | C(4A)-C(3A)-H(3C) | 109.4      |                     |            |
| C(4A)-H(4D)      | 0.9900     | C(2A)-C(3A)-H(3C) | 109.4      |                     |            |
| O(1)-C(5)        | 1.3445(18) | C(4A)-C(3A)-H(3D) | 109.4      |                     |            |
| C(5)-O(2)        | 1.2071(17) | C(2A)-C(3A)-H(3D) | 109.4      |                     |            |
| C(5)-C(6)        | 1.4662(19) | H(3C)-C(3A)-H(3D) | 108.0      |                     |            |
| C(6)-C(7)        | 1.367(2)   | O(1)-C(4A)-C(3A)  | 105.5(8)   |                     |            |
| C(6)-S(1)        | 1.7207(13) | O(1)-C(4A)-H(4C)  | 110.6      |                     |            |
| C(7)-C(8)        | 1.410(2)   | C(3A)-C(4A)-H(4C) | 110.6      |                     |            |
| C(7)-H(7)        | 0.9500     | O(1)-C(4A)-H(4D)  | 110.6      |                     |            |
| C(8)-C(9)        | 1.3686(19) | C(3A)-C(4A)-H(4D) | 110.6      |                     |            |
| C(8)-H(8)        | 0.9500     | H(4C)-C(4A)-H(4D) | 108.8      |                     |            |
| C(9)-C(10)       | 1.4794(18) | C(5)-O(1)-C(4)    | 115.2(7)   |                     |            |
| C(9)-S(1)        | 1.7220(13) | C(5)-O(1)-C(4A)   | 117.6(6)   |                     |            |
| C(10)-C(12)      | 1.3964(19) | C(4)-O(1)-C(4A)   | 7.1(13)    |                     |            |
| C(10)-C(11)      | 1.4037(19) | O(2)-C(5)-O(1)    | 124.21(13) |                     |            |
| C(11)-C(12)#1    | 1.3899(19) | O(2)-C(5)-C(6)    | 124.04(13) |                     |            |
| C(11)-C(13)      | 1.5090(19) | O(1)-C(5)-C(6)    | 111.73(11) |                     |            |
| C(12)-C(11)#1    | 1.3899(19) | C(7)-C(6)-C(5)    | 126.37(12) |                     |            |
| C(12)-H(12)      | 0.9500     | C(7)-C(6)-S(1)    | 111.28(10) |                     |            |
| C(13)-H(13A)     | 0.9800     | C(5)-C(6)-S(1)    | 122.33(10) |                     |            |
| C(13)-H(13B)     | 0.9800     | C(6)-C(7)-C(8)    | 112.59(12) |                     |            |
| C(13)-H(13C)     | 0.9800     | C(6)-C(7)-H(7)    | 123.7      |                     |            |
| C(1)-C(2)-C(3)   | 102.2(9)   | C(8)-C(7)-H(7)    | 123.7      |                     |            |
| C(1)-C(2)-H(2A)  | 111.3      | C(9)-C(8)-C(7)    | 113.37(13) |                     |            |
| C(3)-C(2)-H(2A)  | 111.3      | C(9)-C(8)-H(8)    | 123.3      |                     |            |
| C(1)-C(2)-H(2B)  | 111.3      | C(7)-C(8)-H(8)    | 123.3      |                     |            |
| C(3)-C(2)-H(2B)  | 111.3      | C(8)-C(9)-C(10)   | 129.79(12) |                     |            |
| H(2A)-C(2)-H(2B) | 109.2      | C(8)-C(9)-S(1)    | 110.71(10) |                     |            |
| C(4)-C(3)-C(2)   | 104.6(10)  | C(10)-C(9)-S(1)   | 119.45(10) |                     |            |

Symmetry transformations used to generate equivalent atoms:

#1 -x+1,-y+1,-z+1

## NMR spectra

(The assignments of the carbon resonances were done by HMBC and HMQC techniques.)

### Dibutyl-5,5'-(1,4-phenylene)bis(thiophene-2-carboxylate) (1b)

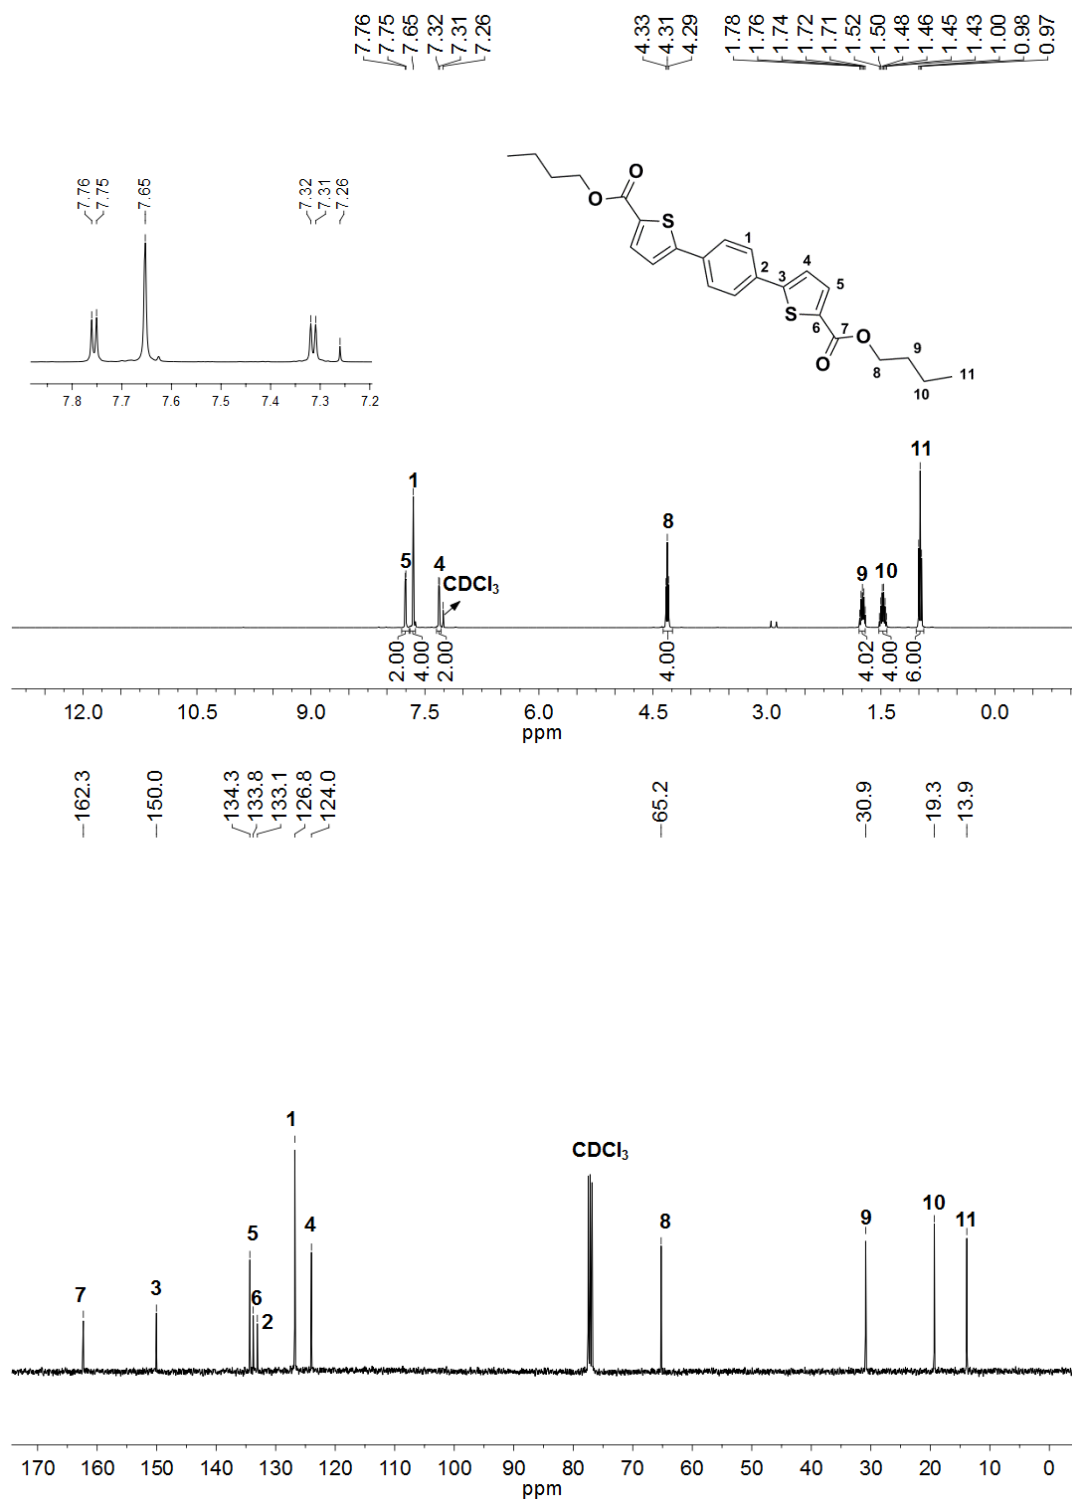

### Dibutyl-5,5'-(2,5-dimethyl-1,4-phenylene)bis(thiophene-2-carboxylate) (2b)

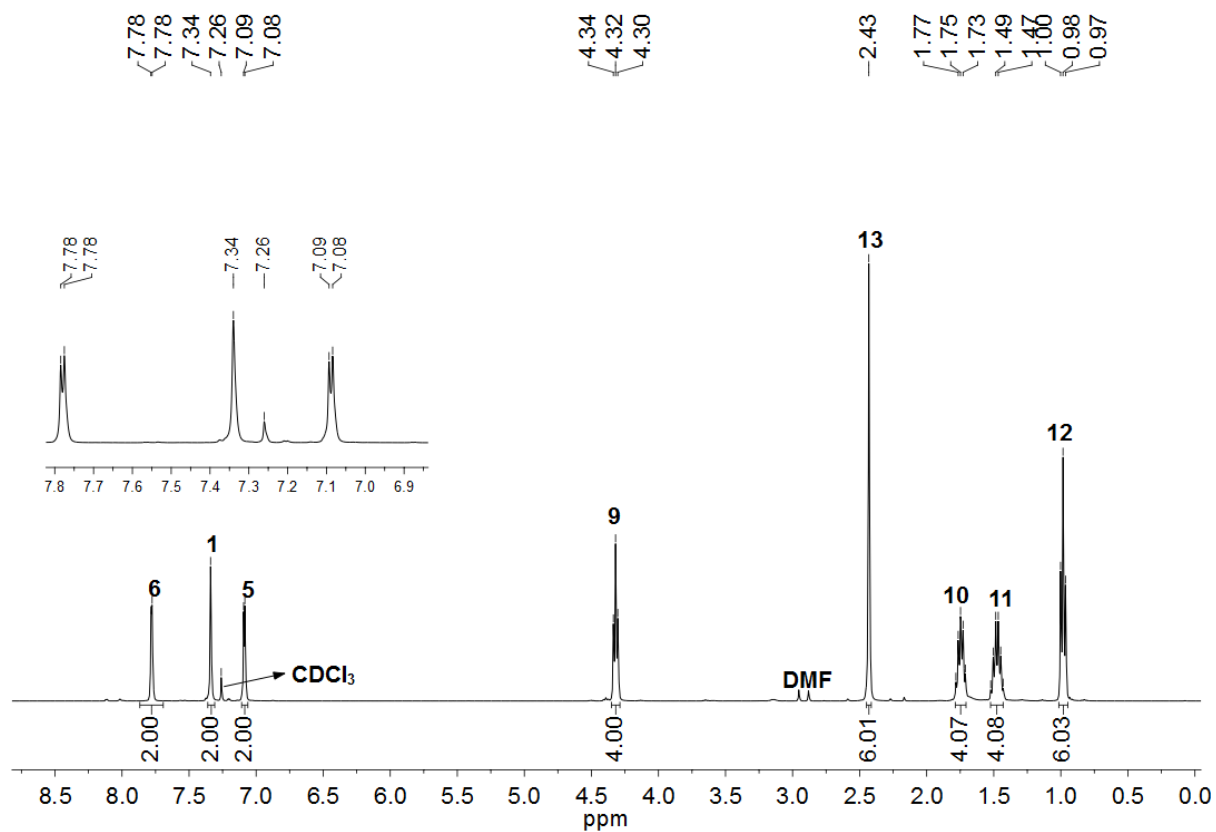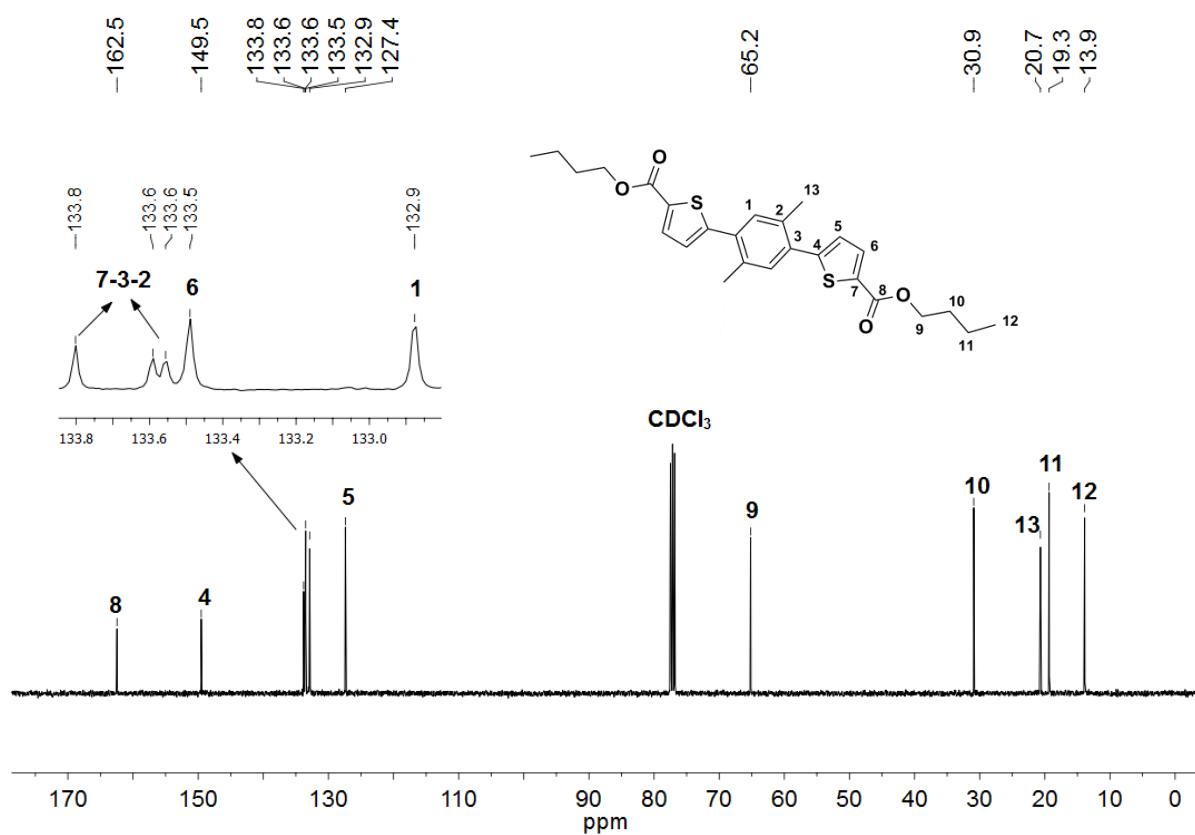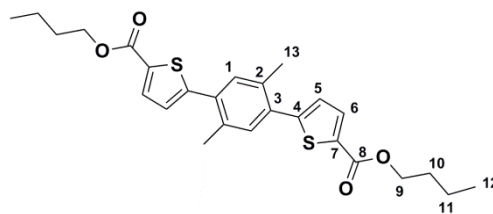



### Tributyl 5,5',5''-(nitrilotris(benzene-4,1-diyl))tris(thiophene-2-carboxylate) (3b)

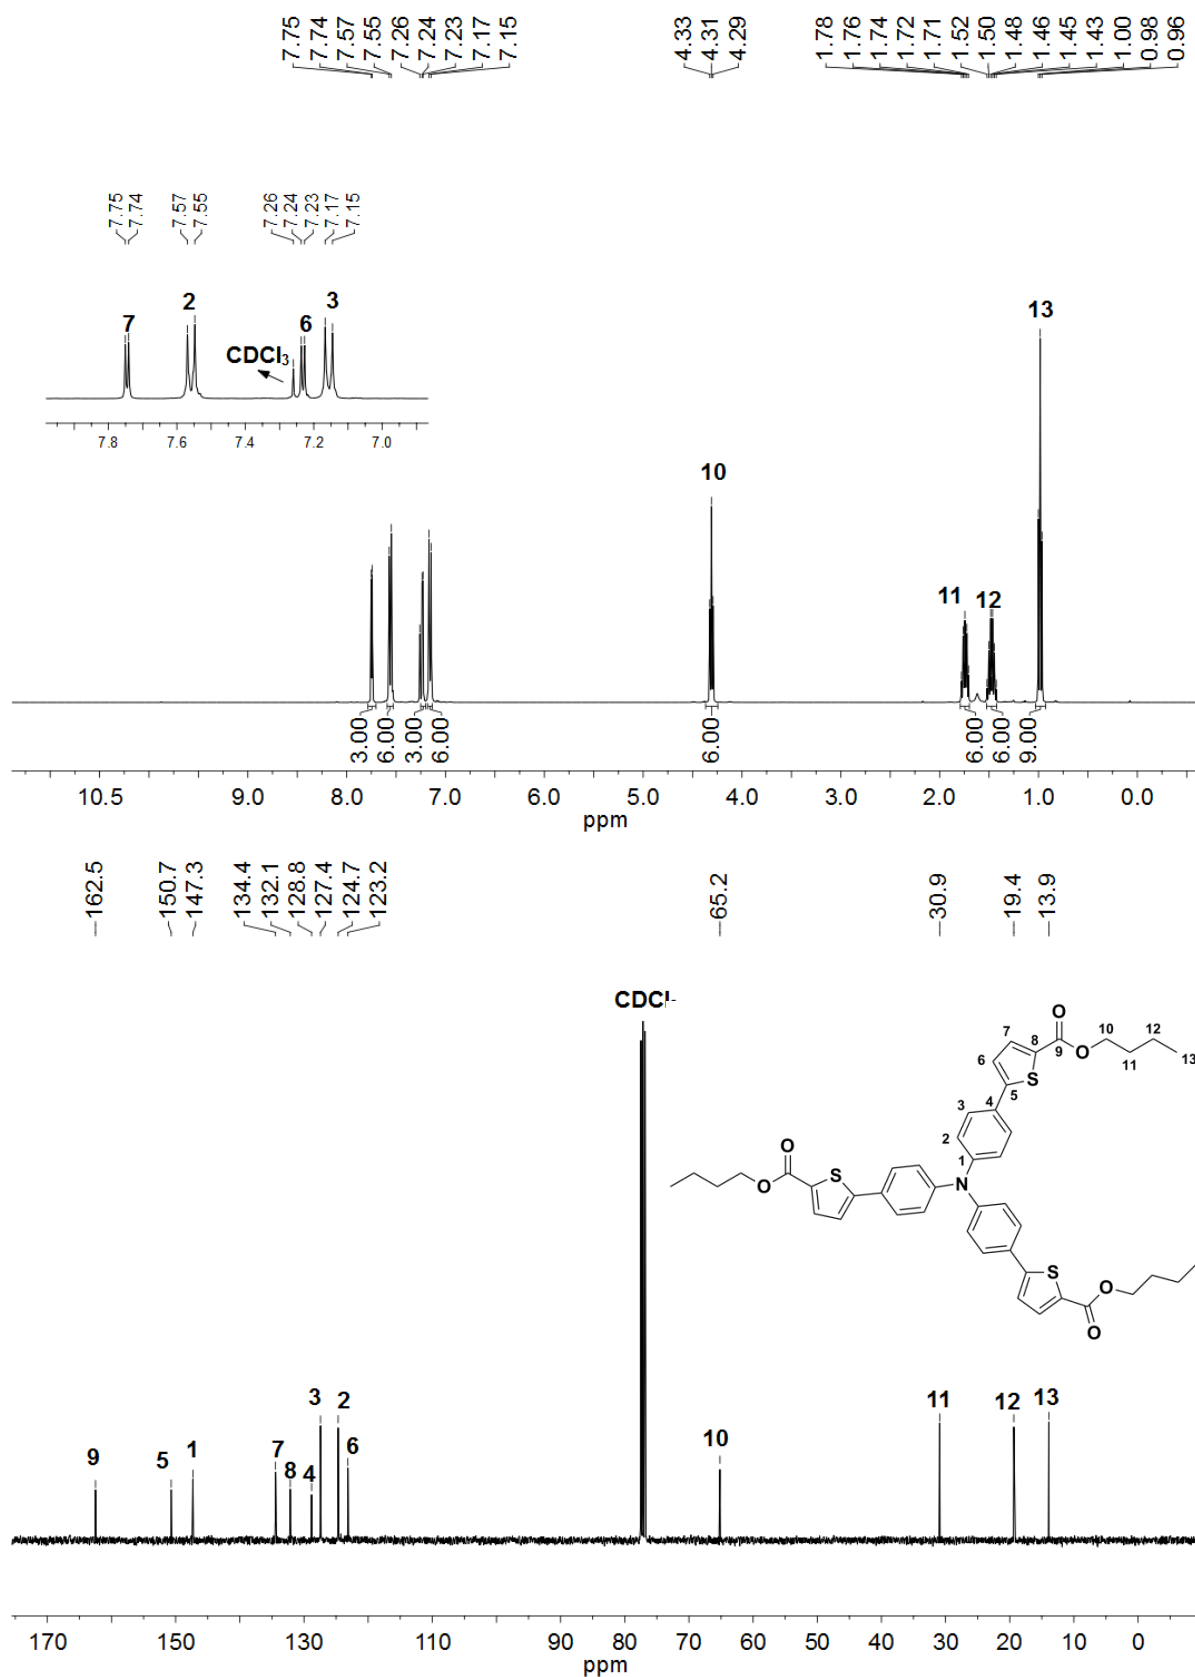

### 5,5'-(1,4-Phenylene)bis(thiophene-5,2-diyl)dimethanol (1c)

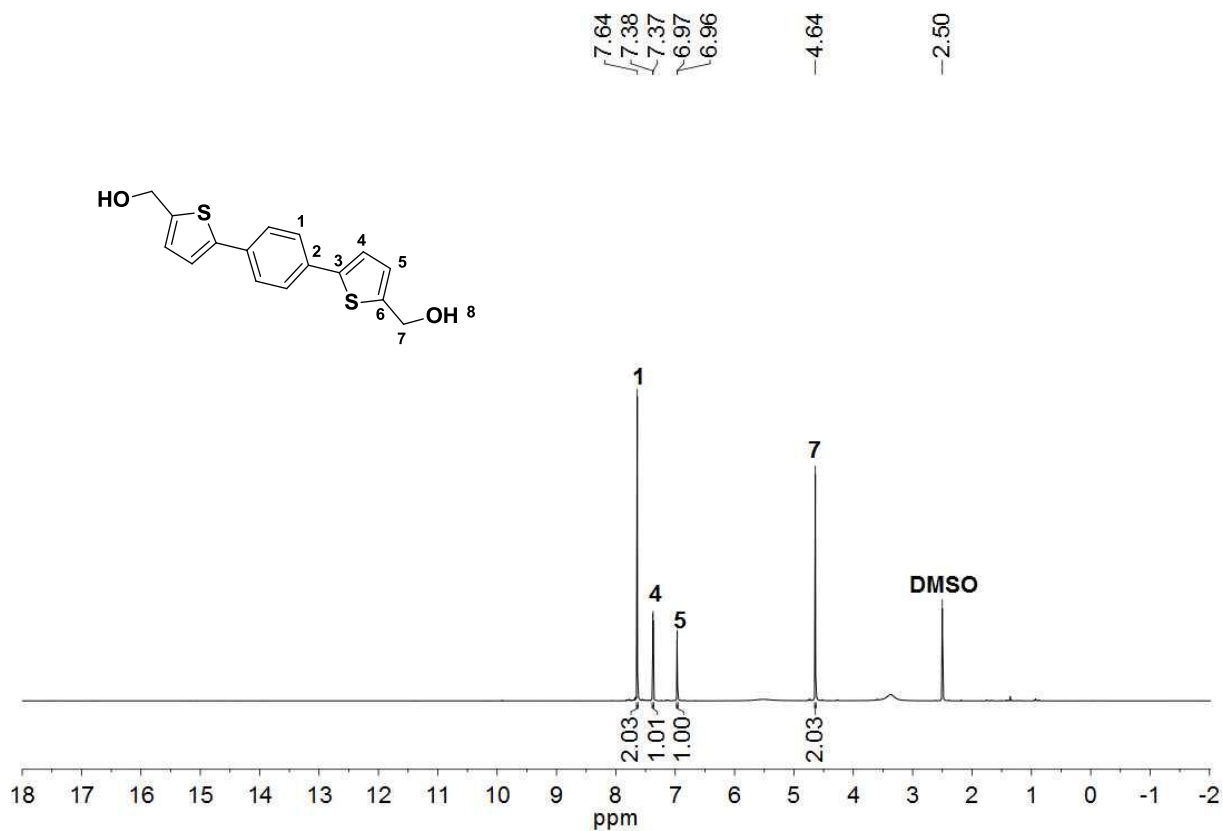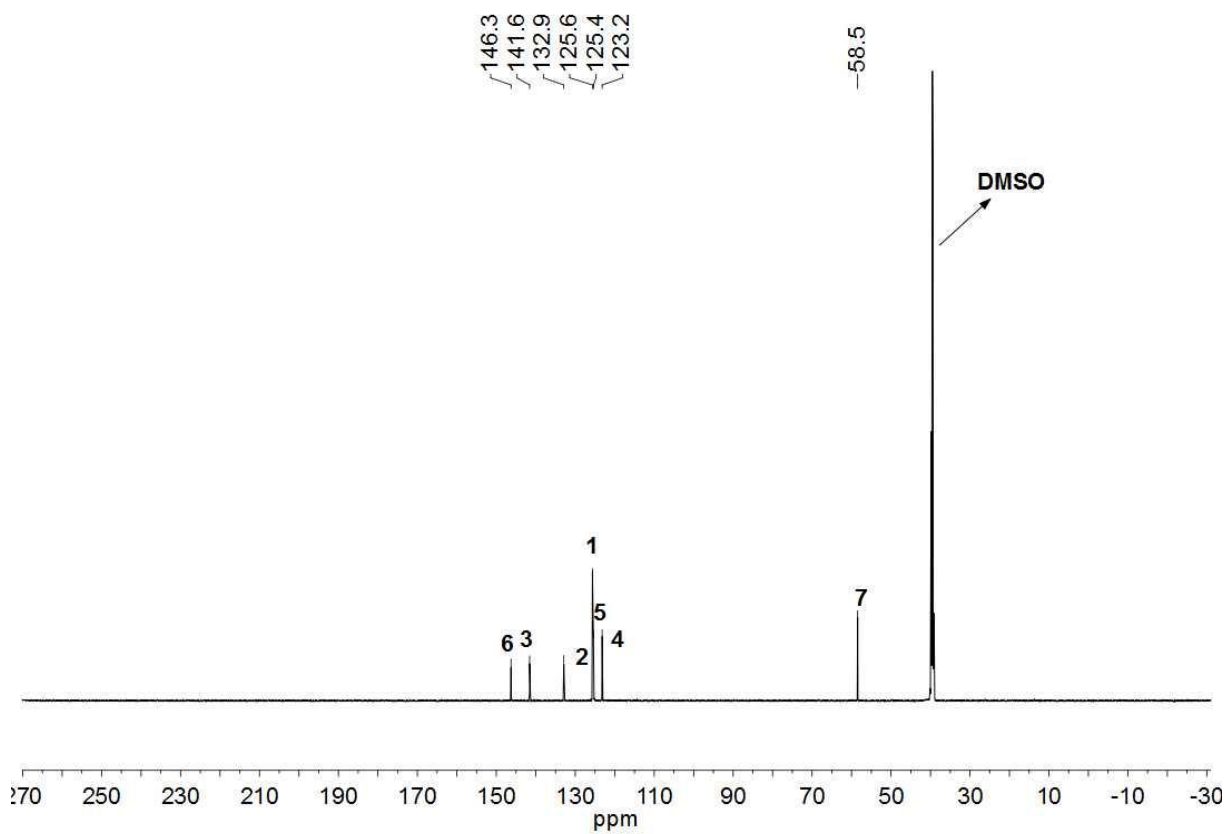

**5,5'-(2,5-Dimethyl-1,4-phenylene)bis(thiophene-5,2-diyl)dimethanol (2c)**

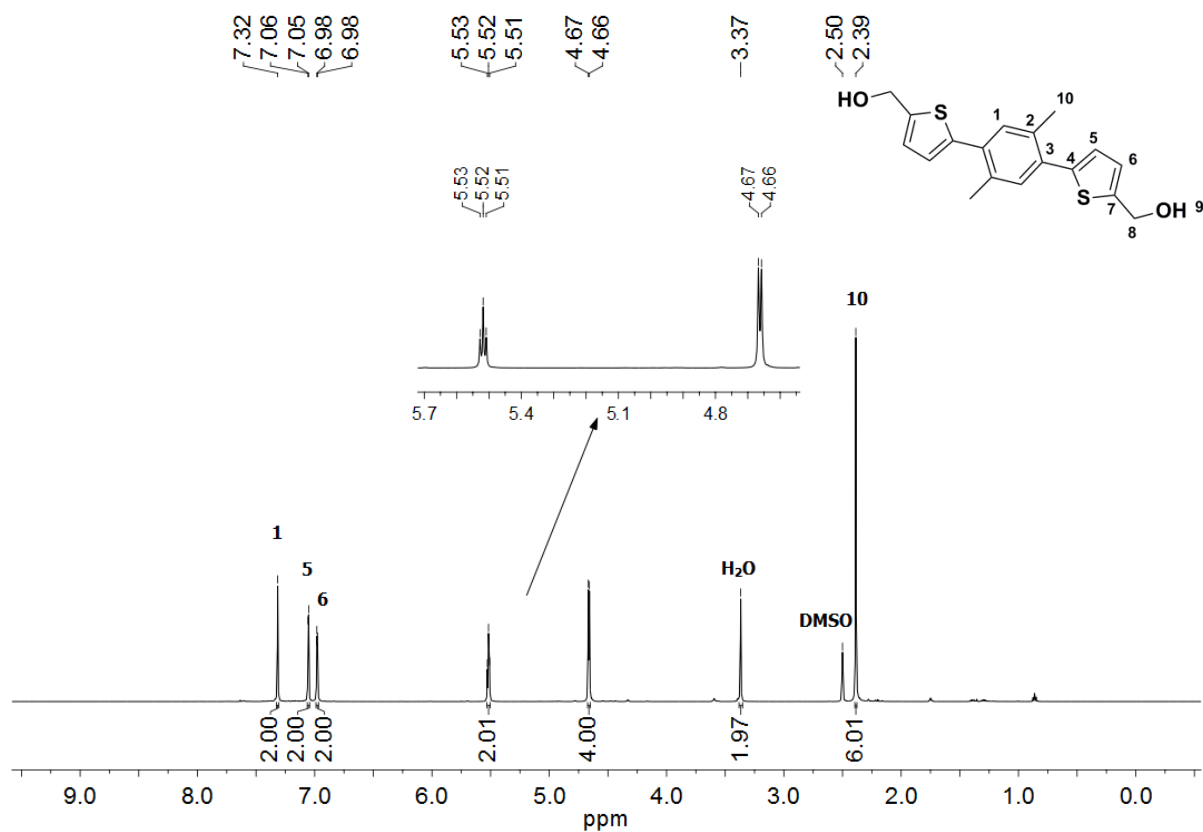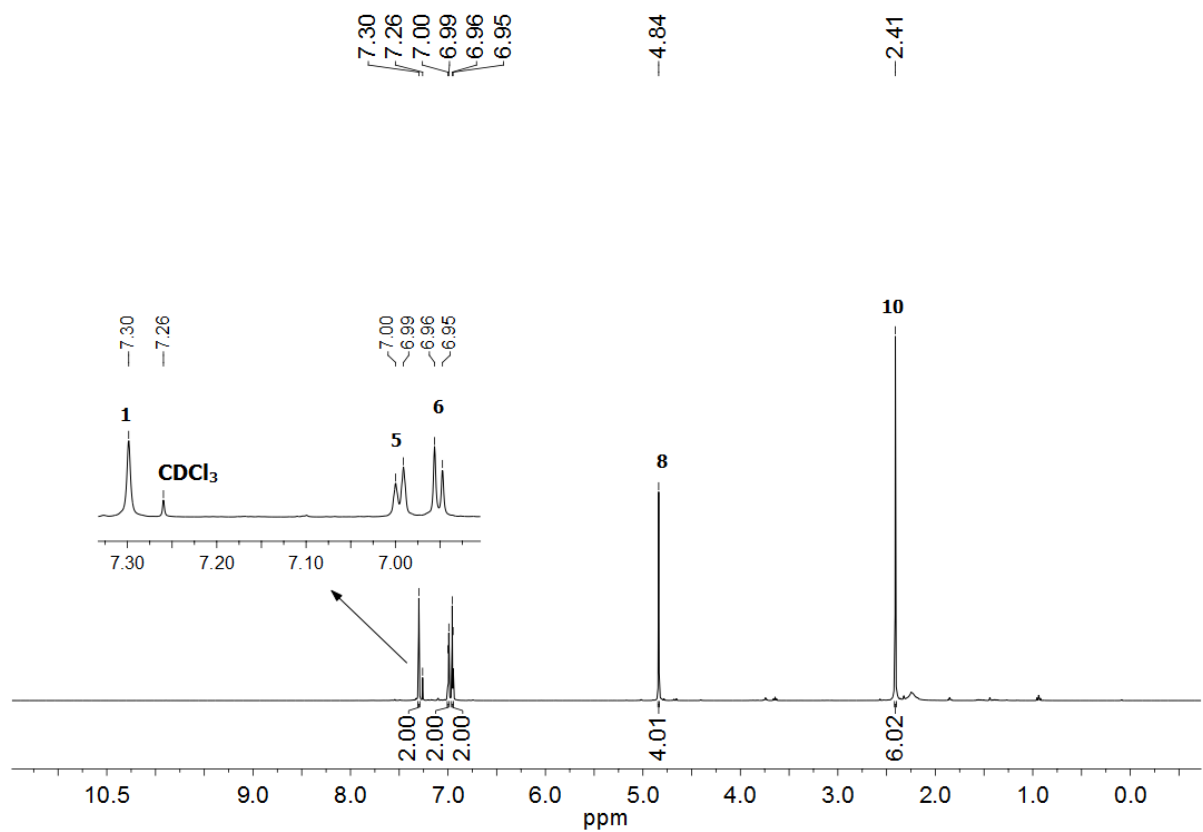

5,5',5''-(Nitrilotris(benzene-4,1-diyl))tris(thiophene-5,2-diyl)trimethanol (3c)

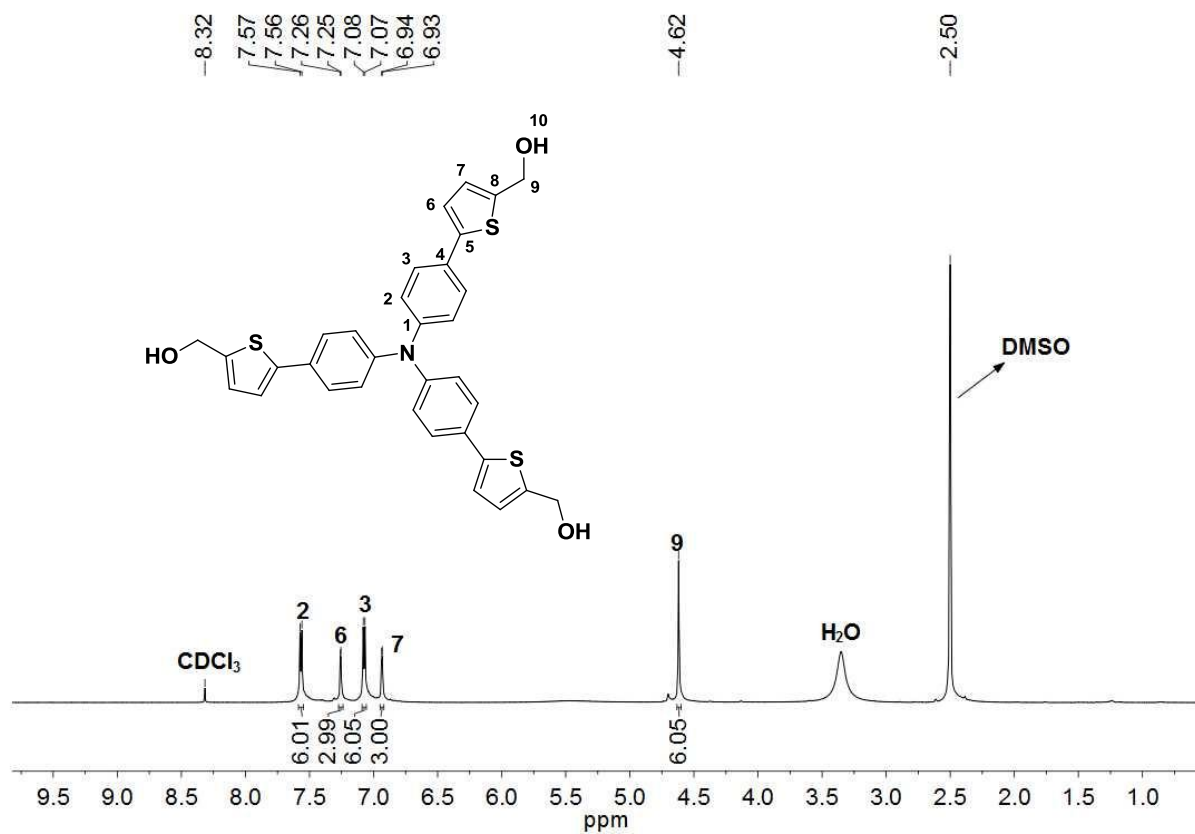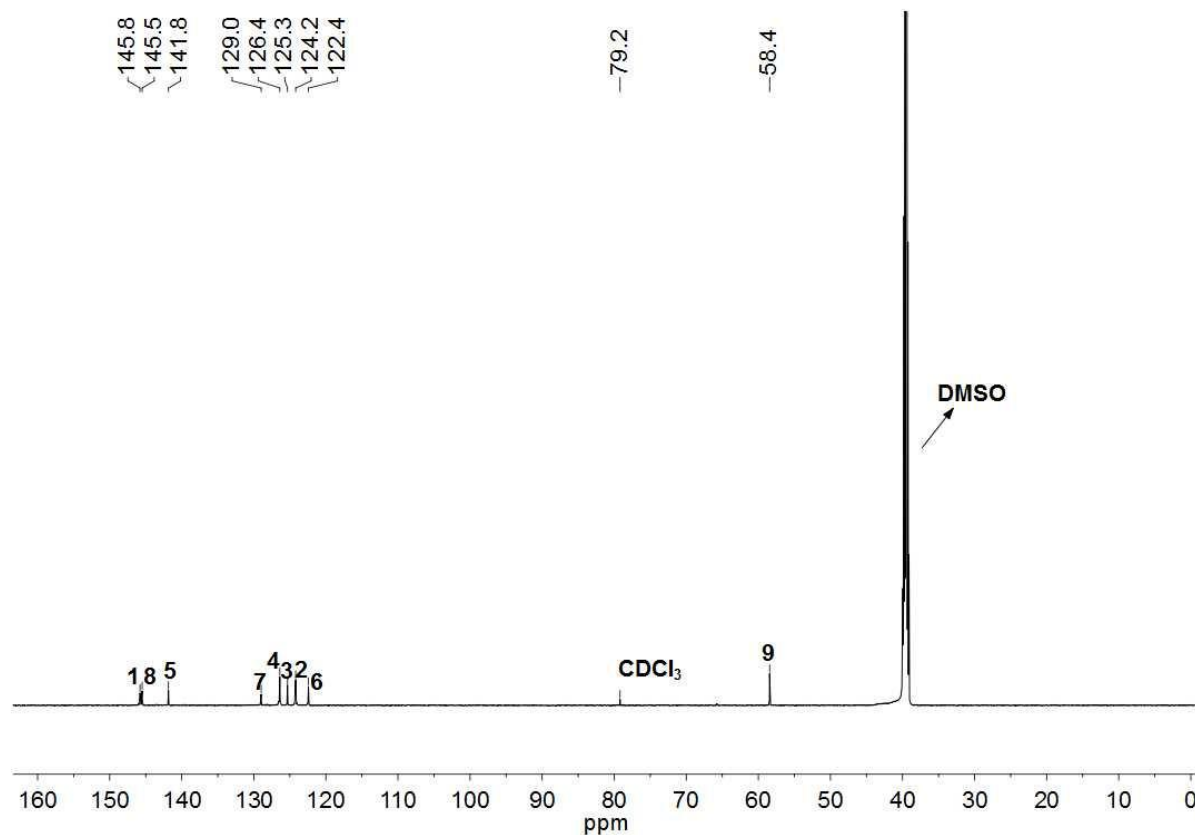

### 1,4-Bis(5-chloromethyl)thiophen-2-yl)benzene (1d)

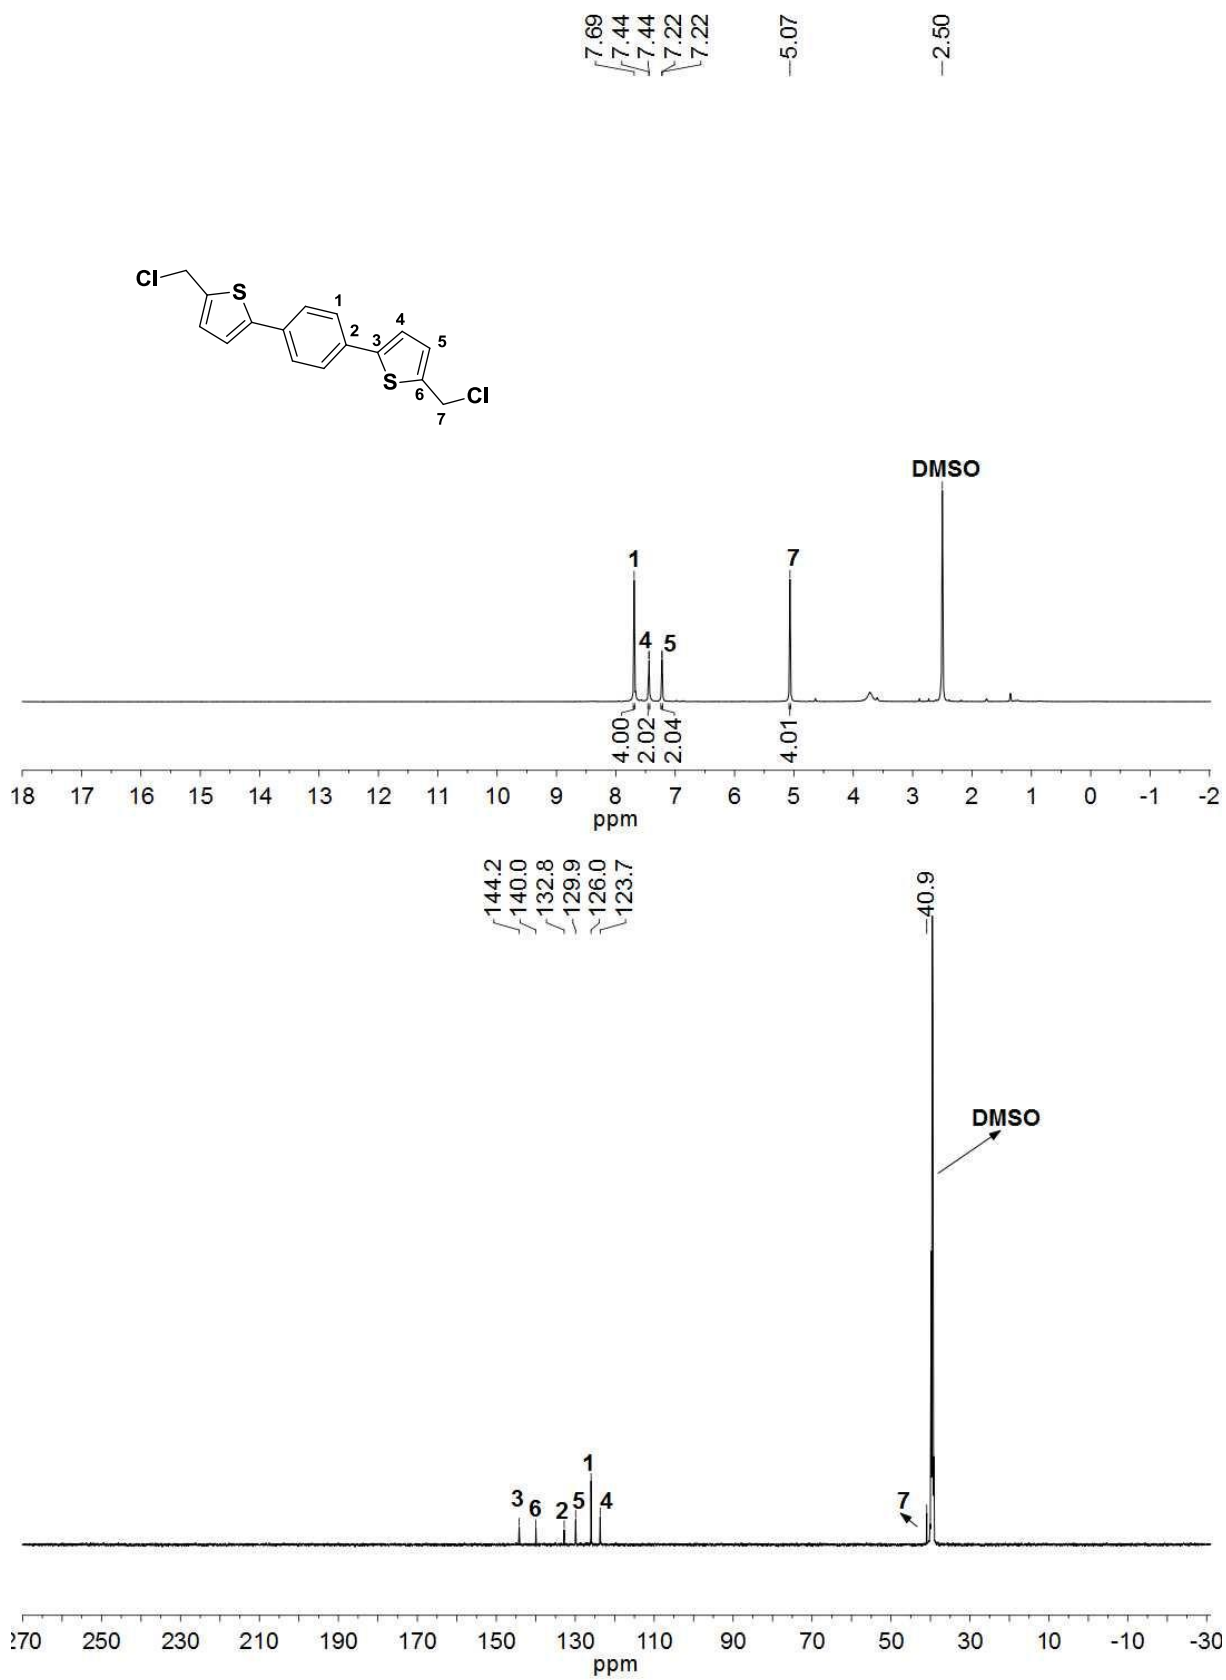

### 5,5'-(2,5-Dimethyl-1,4-phenylene)bis(2-(chloromethyl)thiophene) (2d)

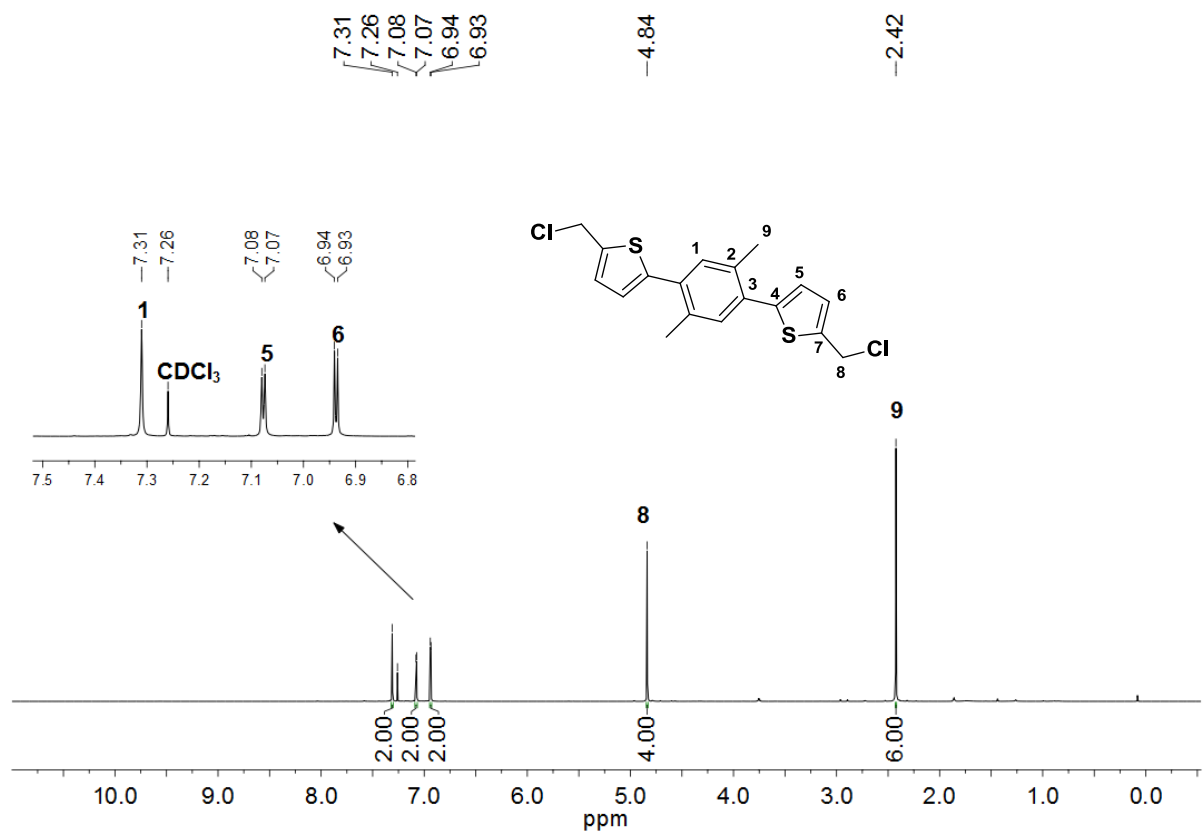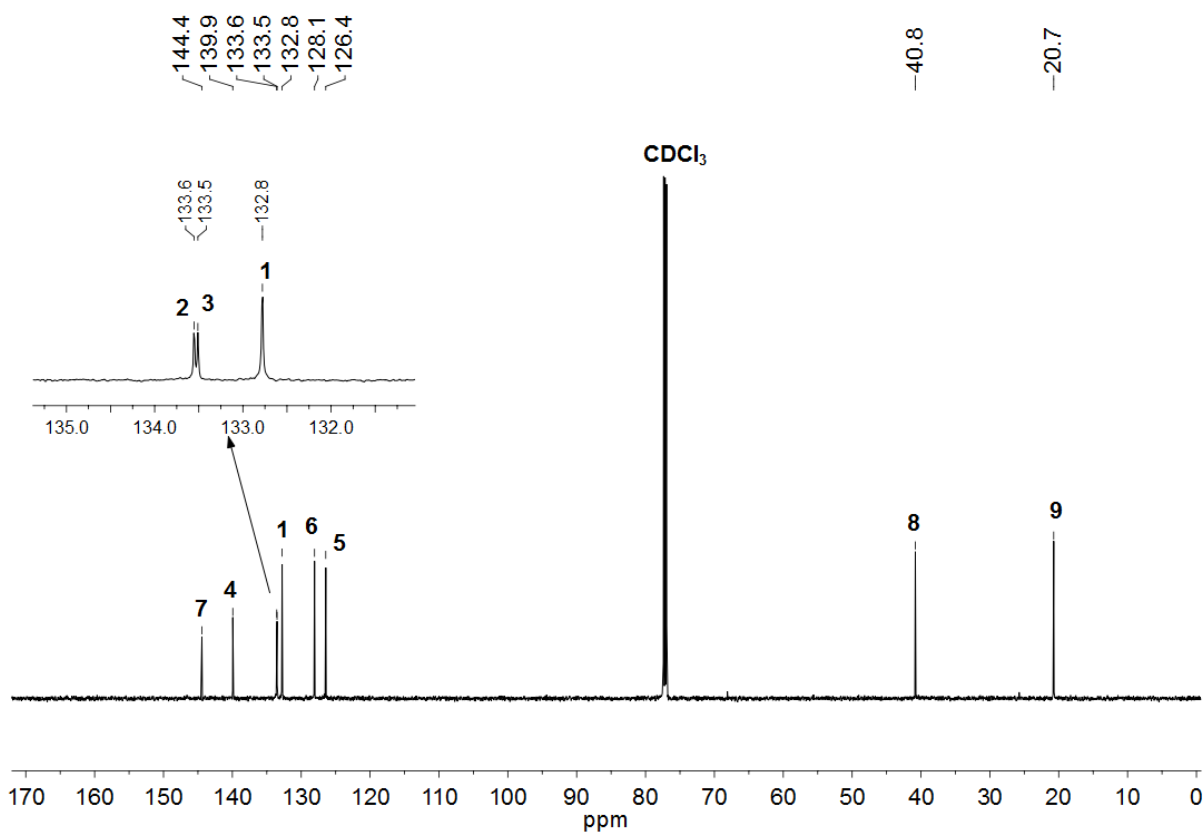

### Tris(4-(5-(chloromethyl)thiophen-2-yl)phenyl)amine (3d)

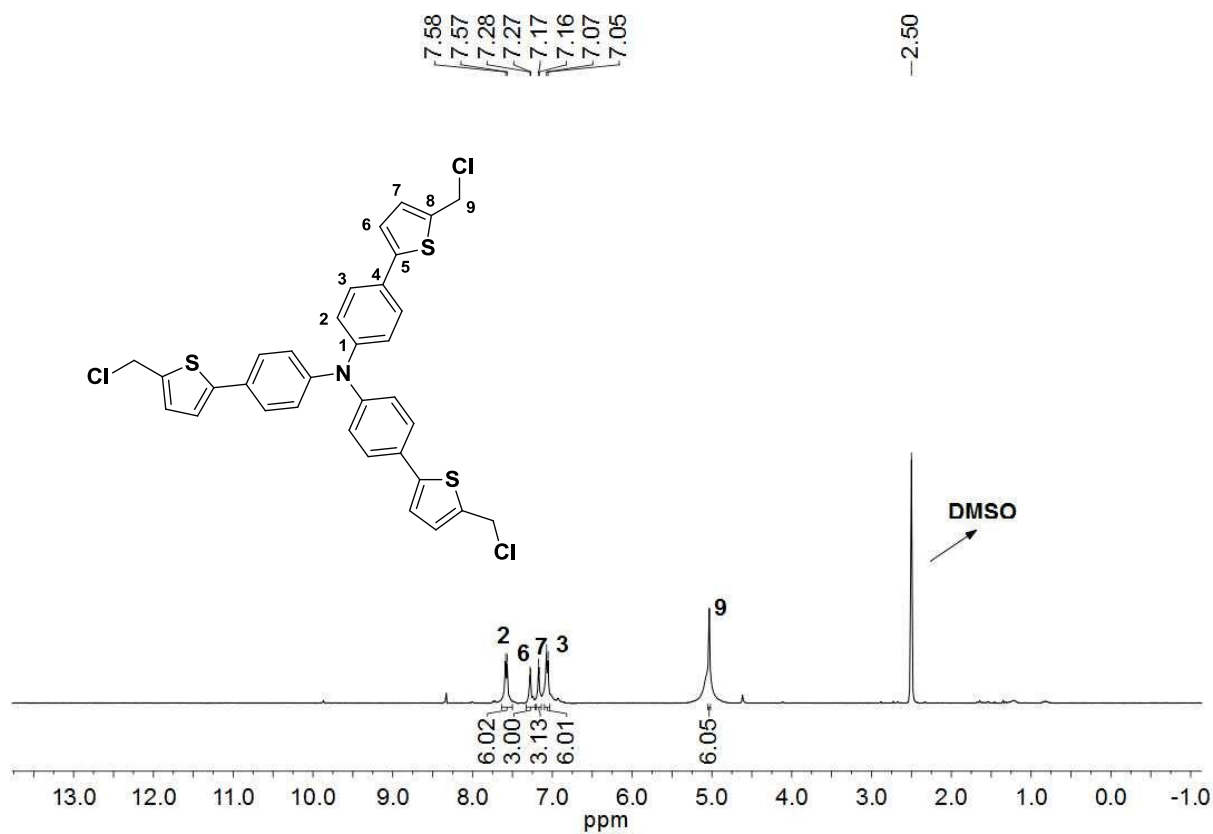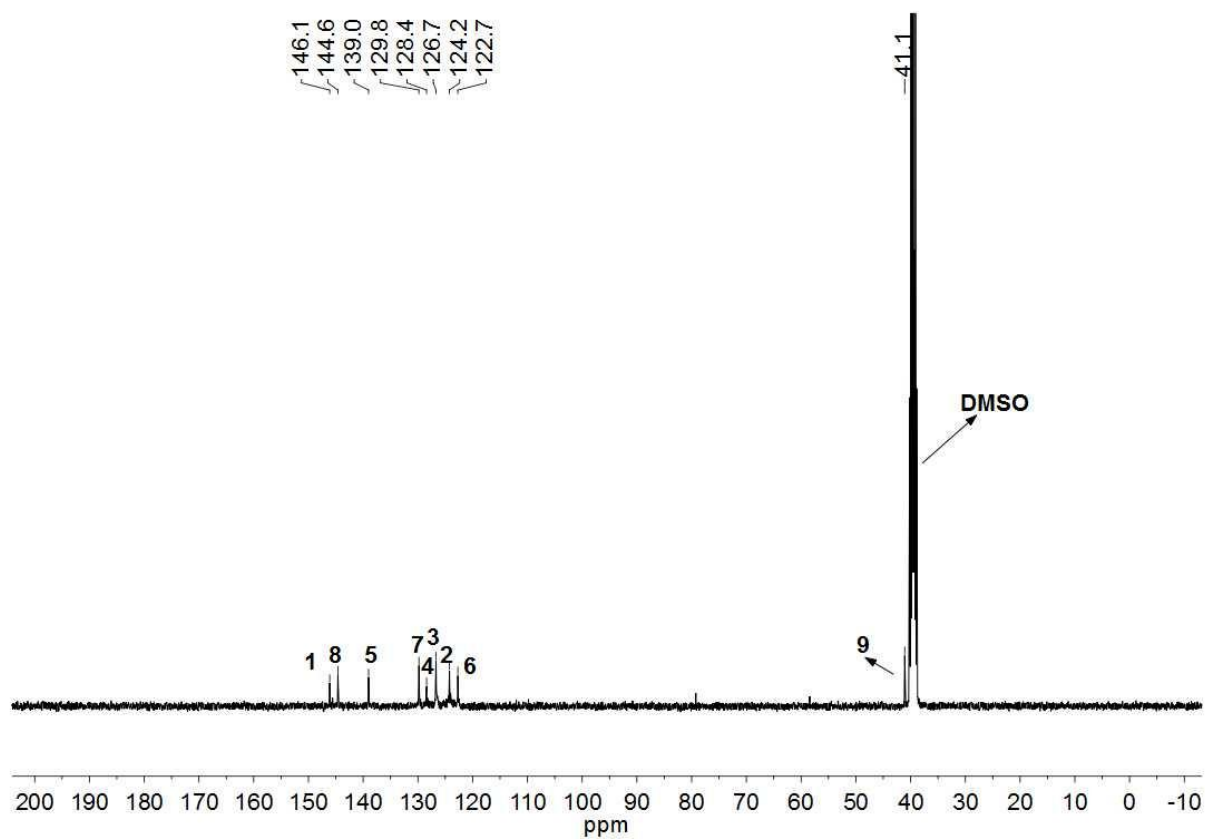

**Tetraethyl-((5,5'-(1,4-phenylene)bis(thiophene-5,2-diyl)) bis(methylene))bis(phosphonate) (1e)**

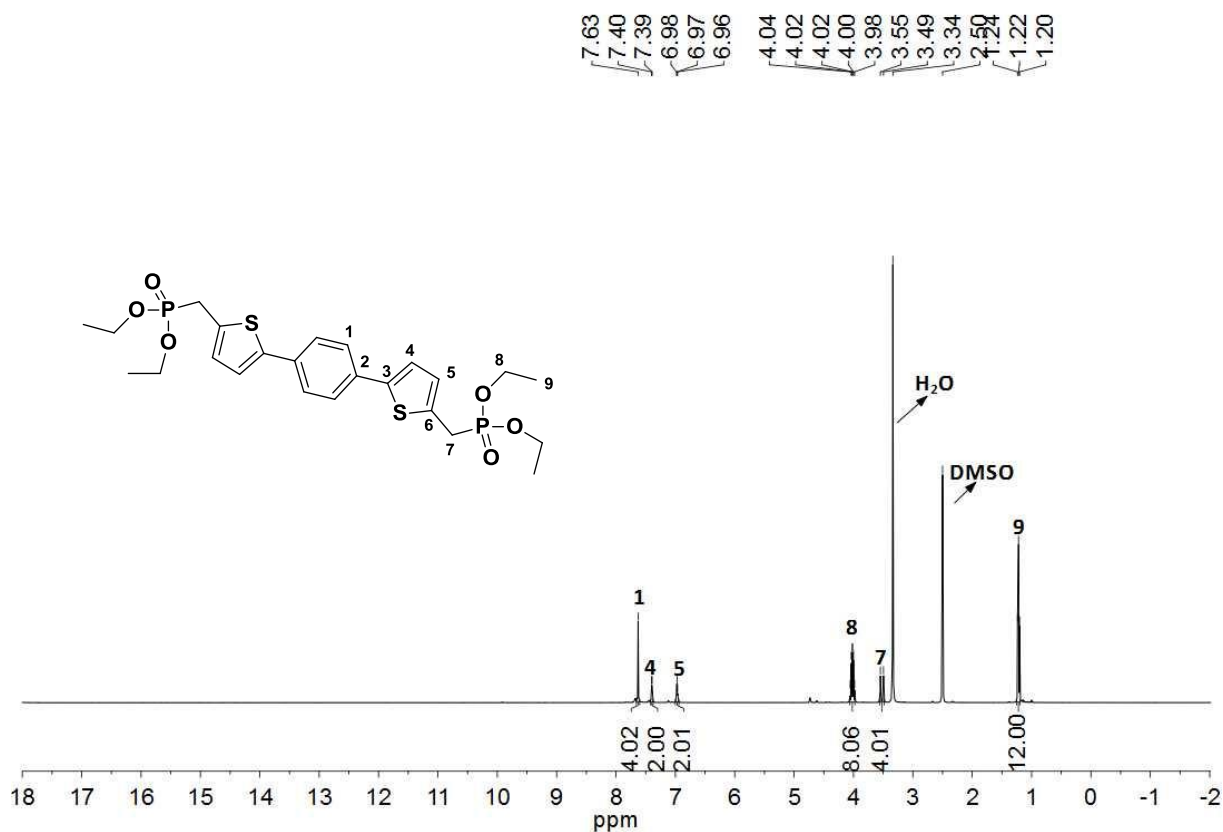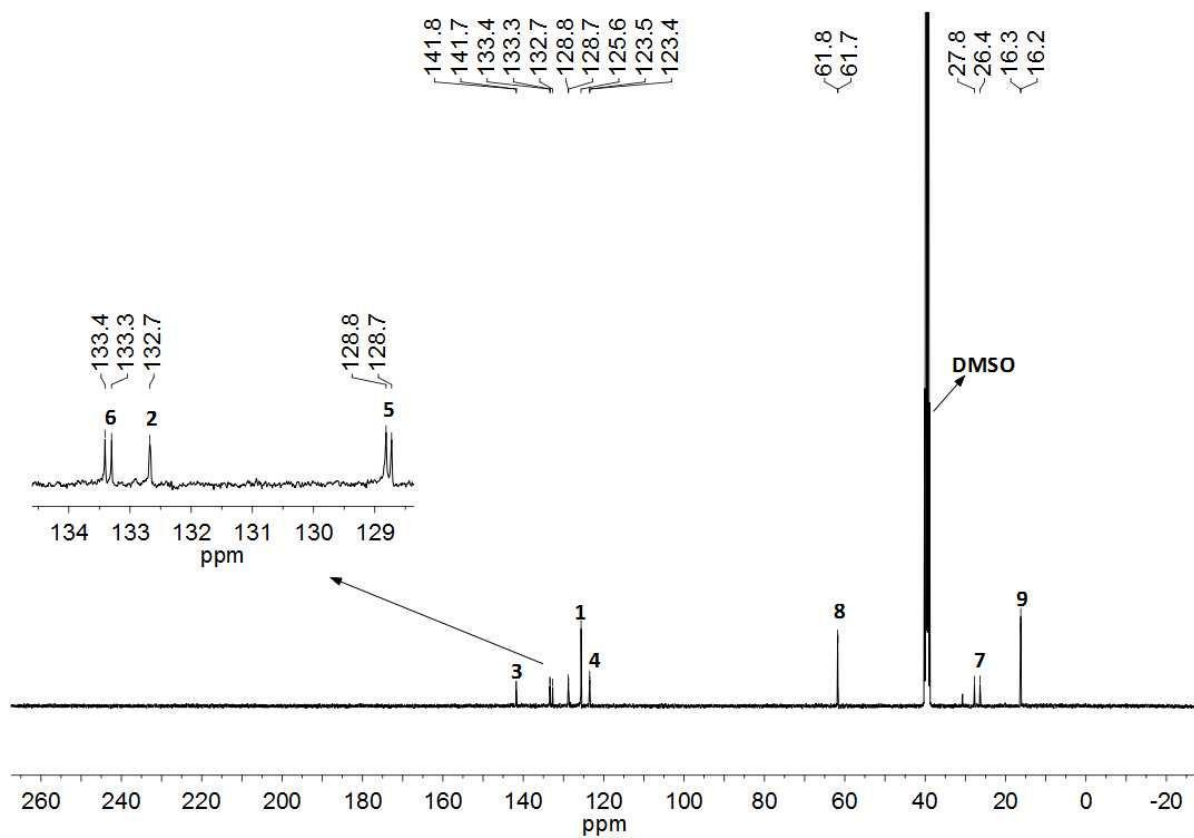



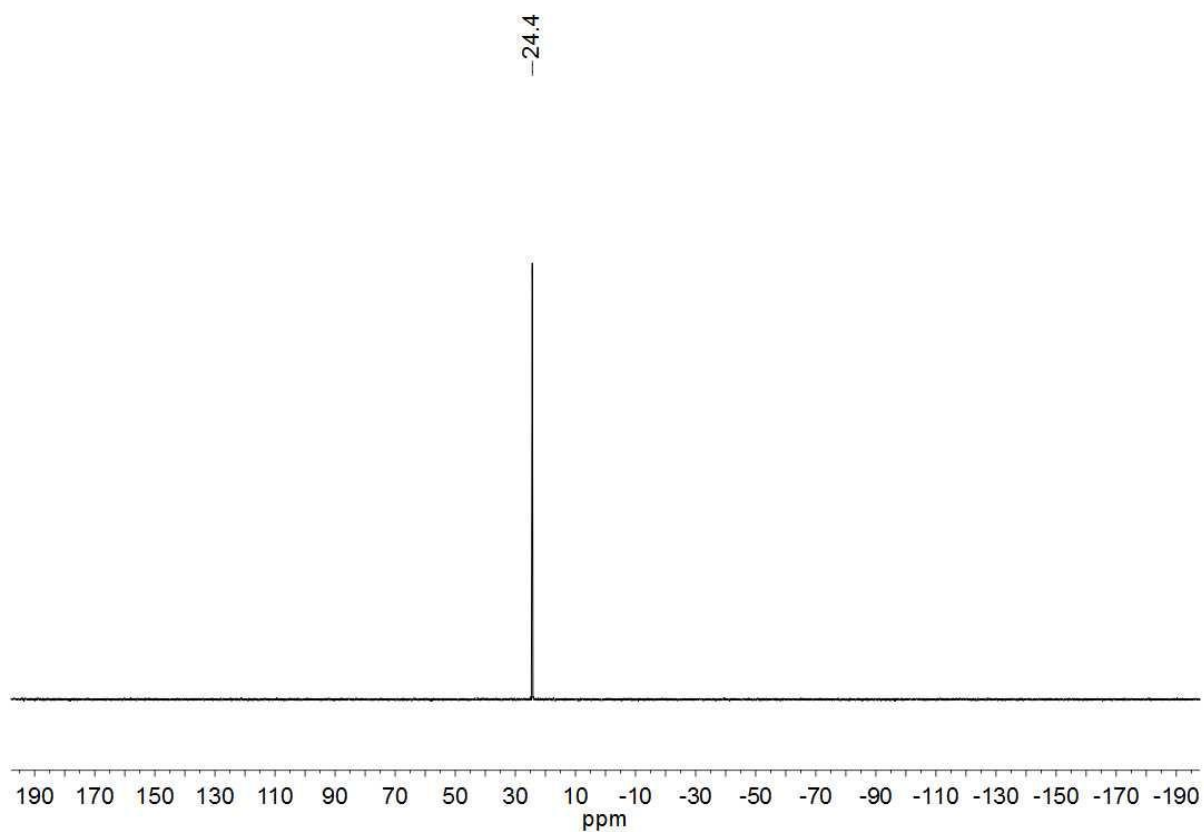

**Tetraethyl-((5,5'-(2,5-dimethyl-1,4-phenylene)bis(thiophene-5,2-diyl))bis(methylene))bis(phosphonate) (2e)**

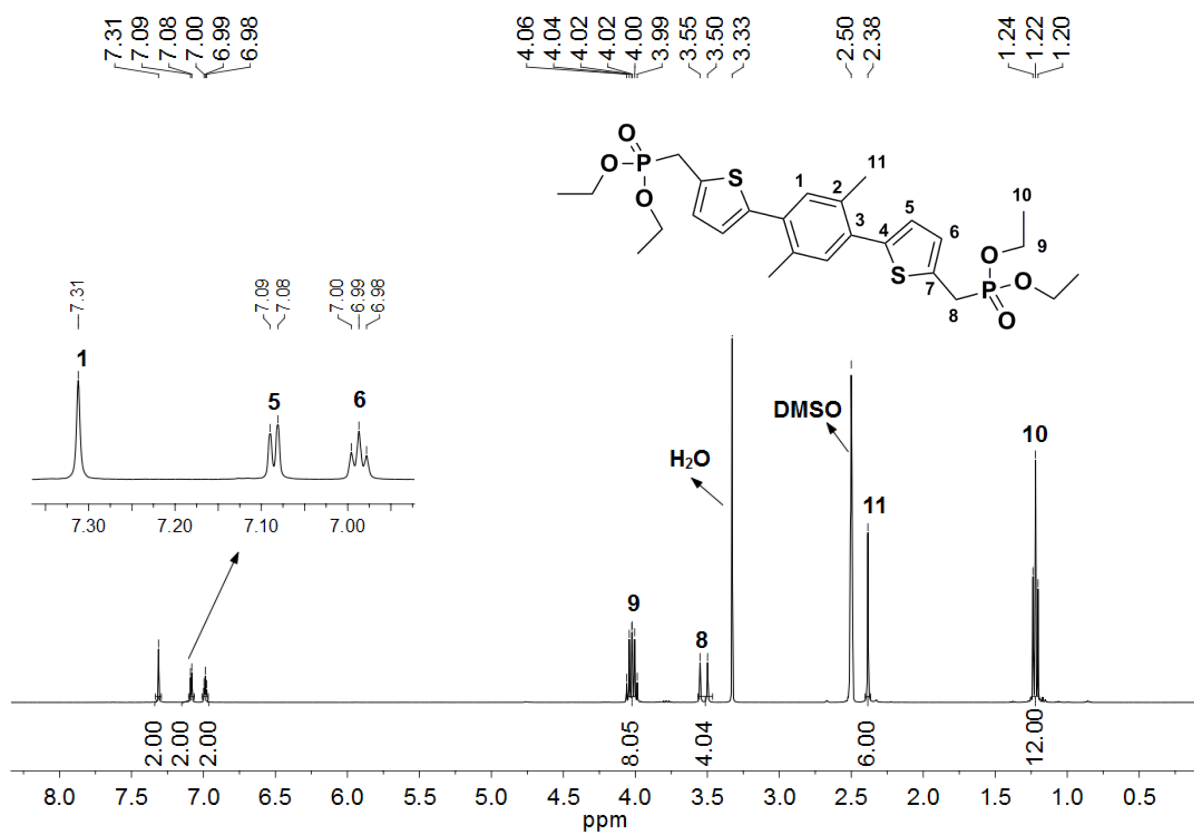

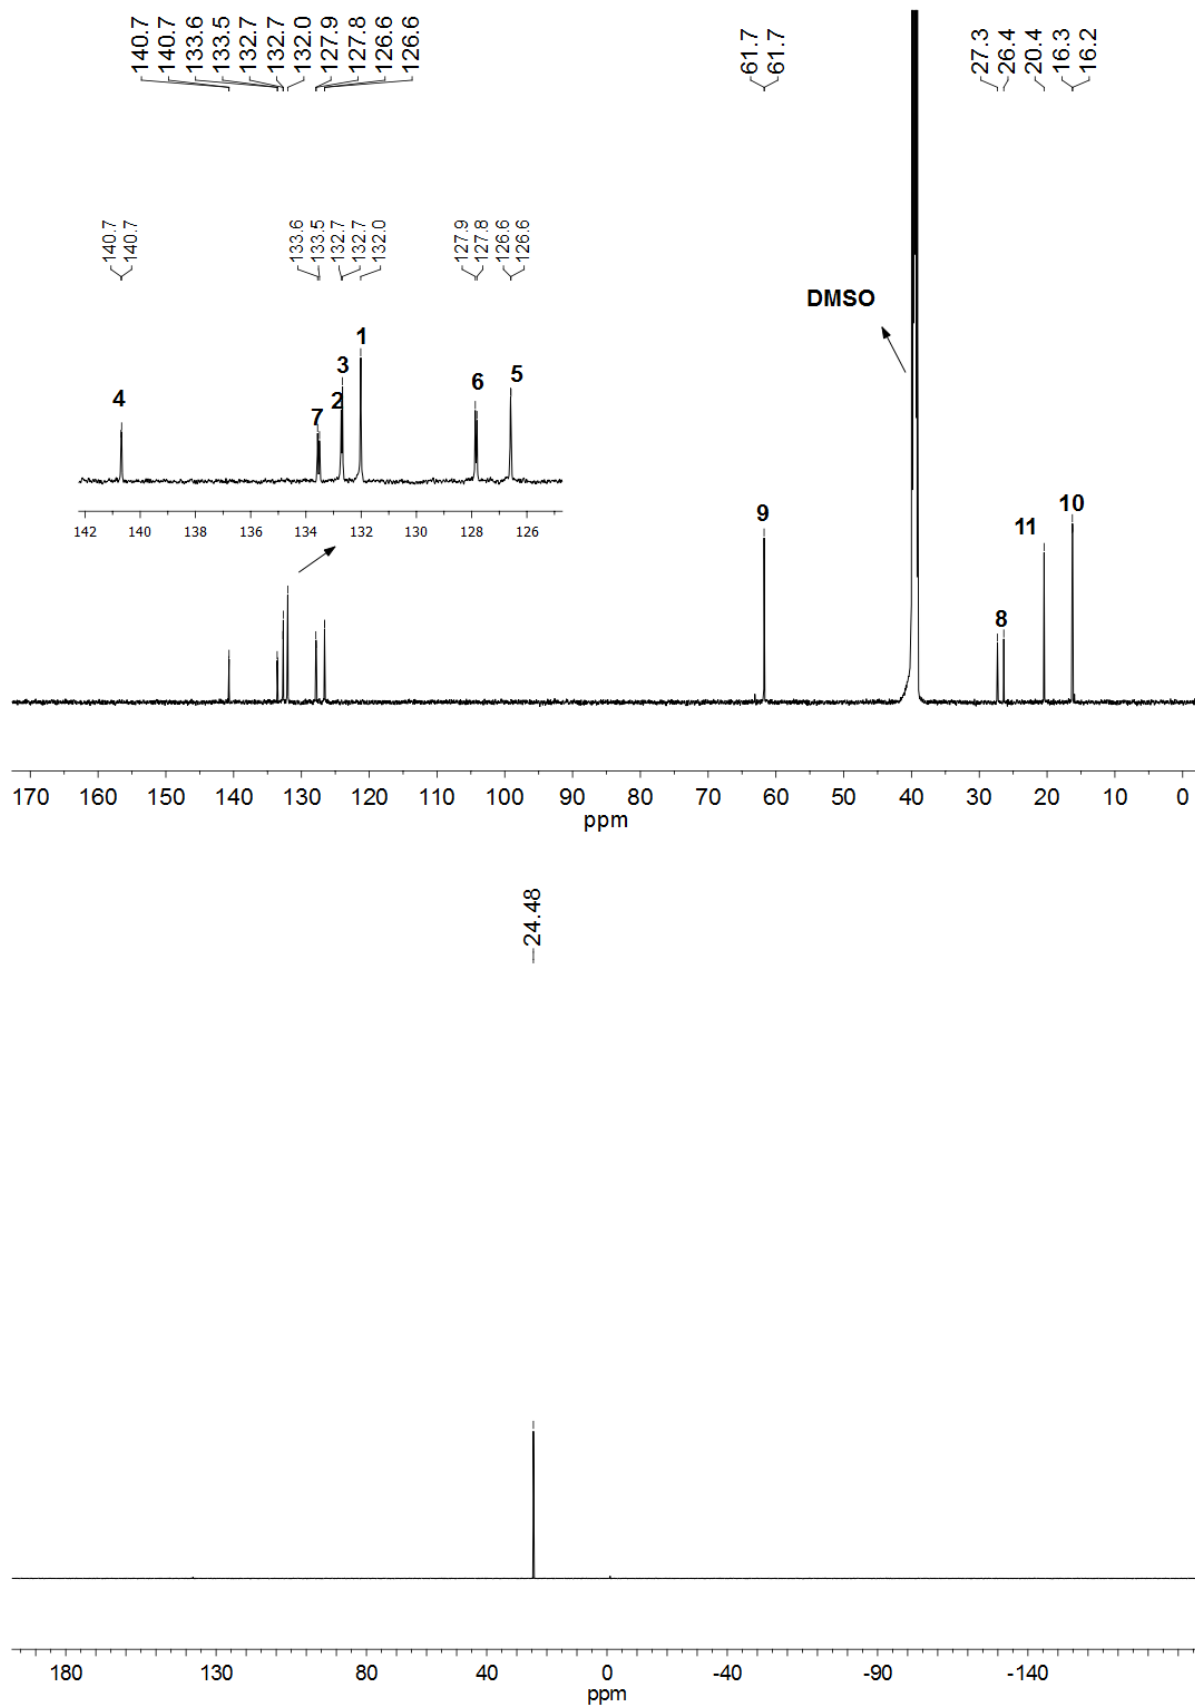

**Hexaethyl((5,5',5''-(nitrotris(benzene-4,1-diyl))tris(thiophene-5,2-diyl))tris(methylene)tris(phosphonate) (3e)**

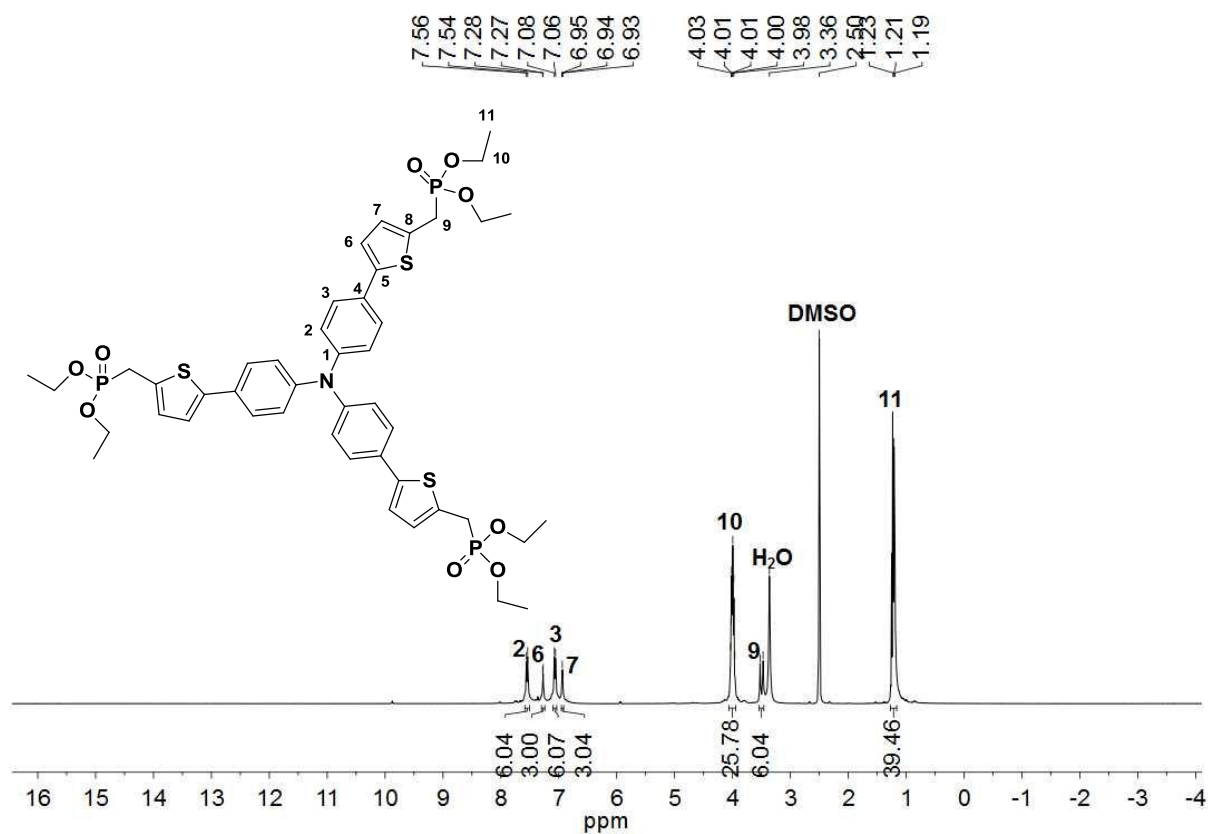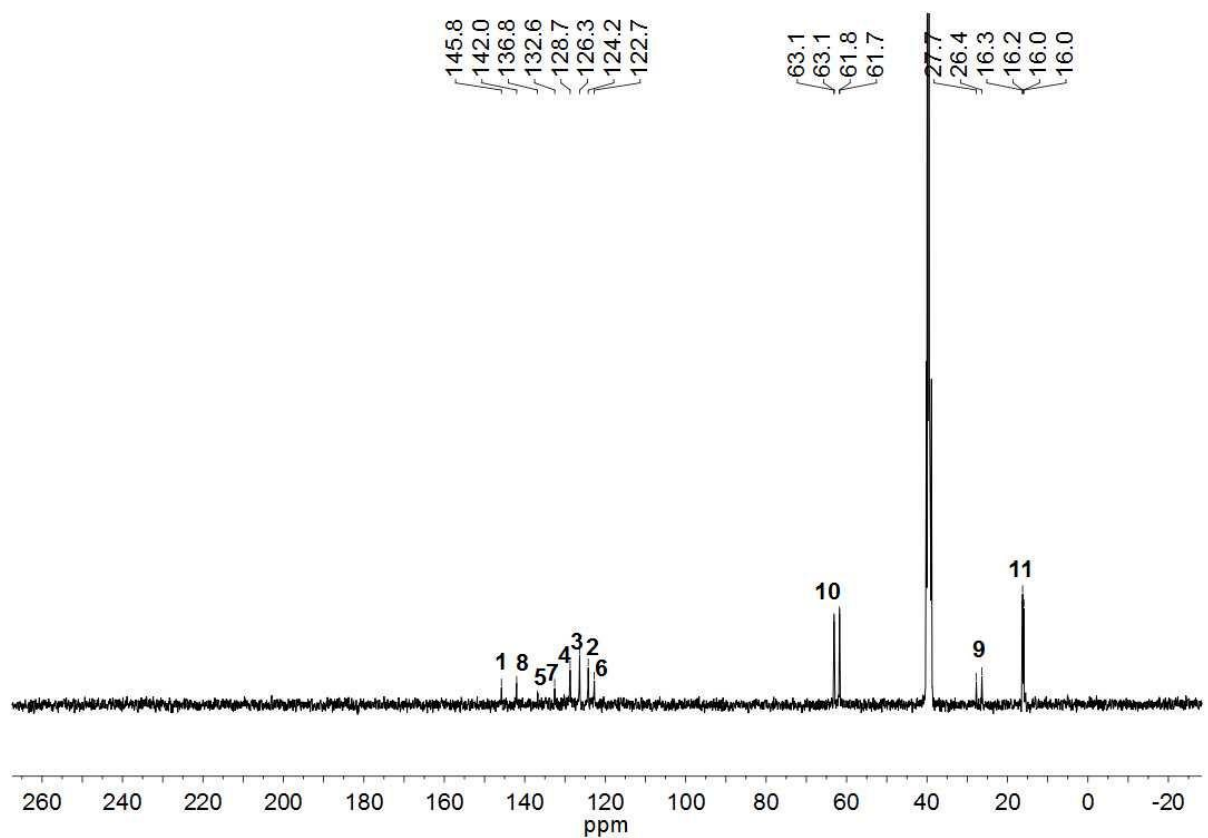

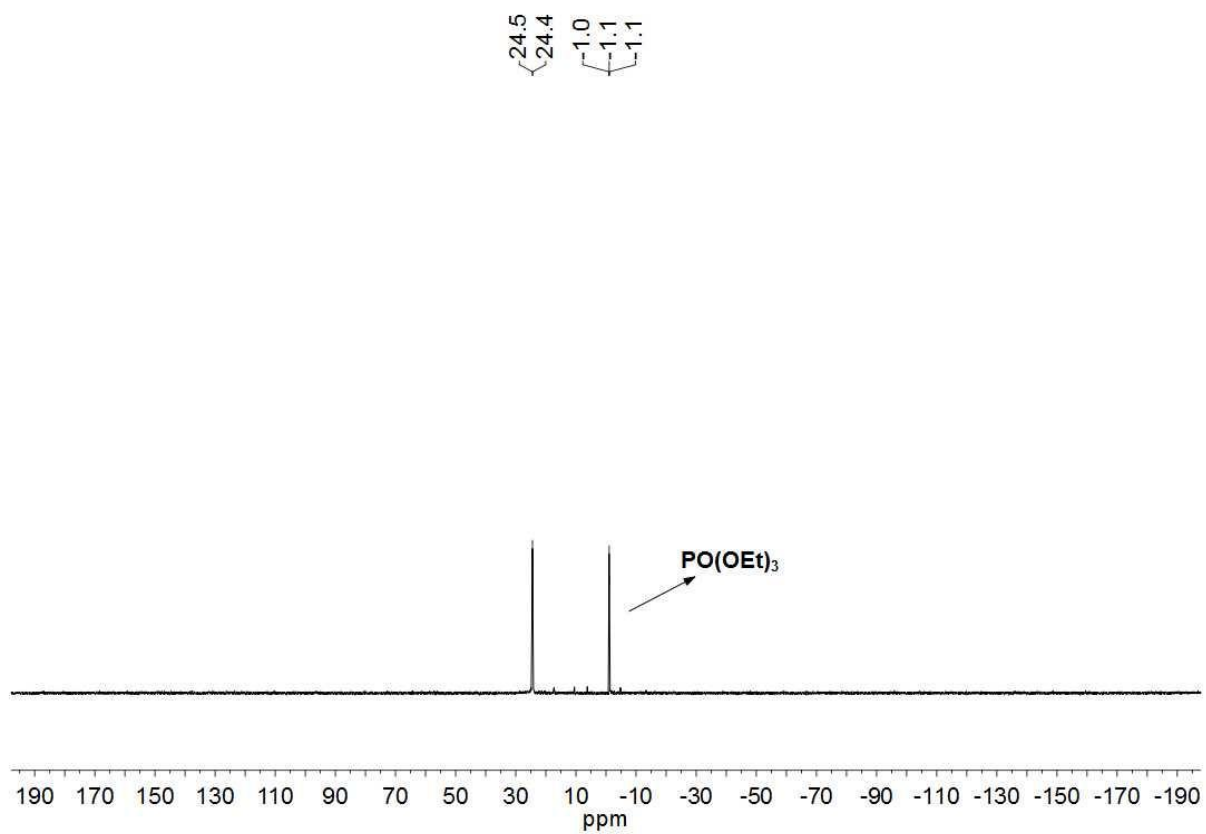

## IR spectra

### Dibutyl-5,5'-(1,4-phenylene)bis(thiophene-2-carboxylate) (1b)

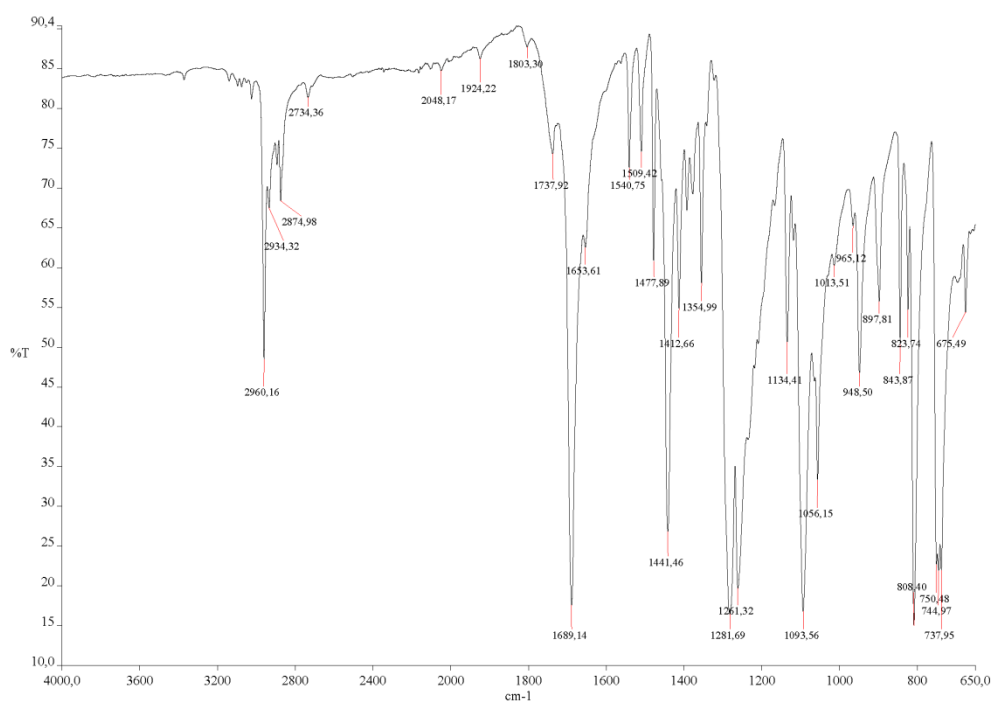

### Dibutyl-5,5'-(2,5-dimethyl-1,4-phenylene)bis(thiophene-2-carboxylate) (2b)

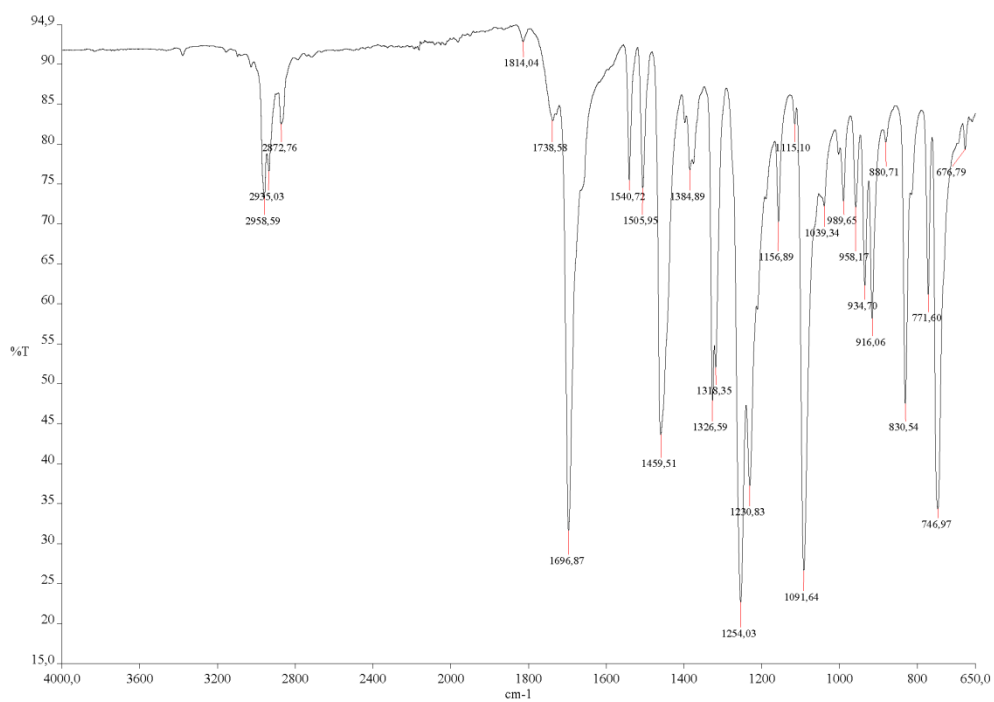

### Tributyl 5,5',5''-(nitrilotris(benzene-4,1-diyl))tris(thiophene-2-carboxylate) (3b)

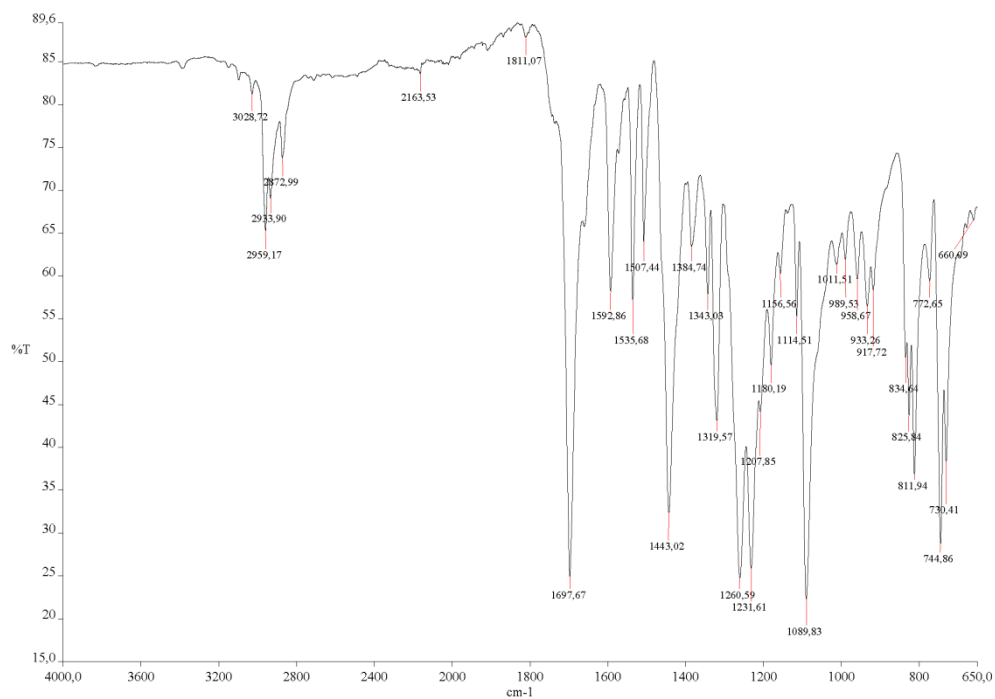

### 5,5'-(1,4-Phenylene)bis(thiophene-5,2-diyl)dimethanol (1c)

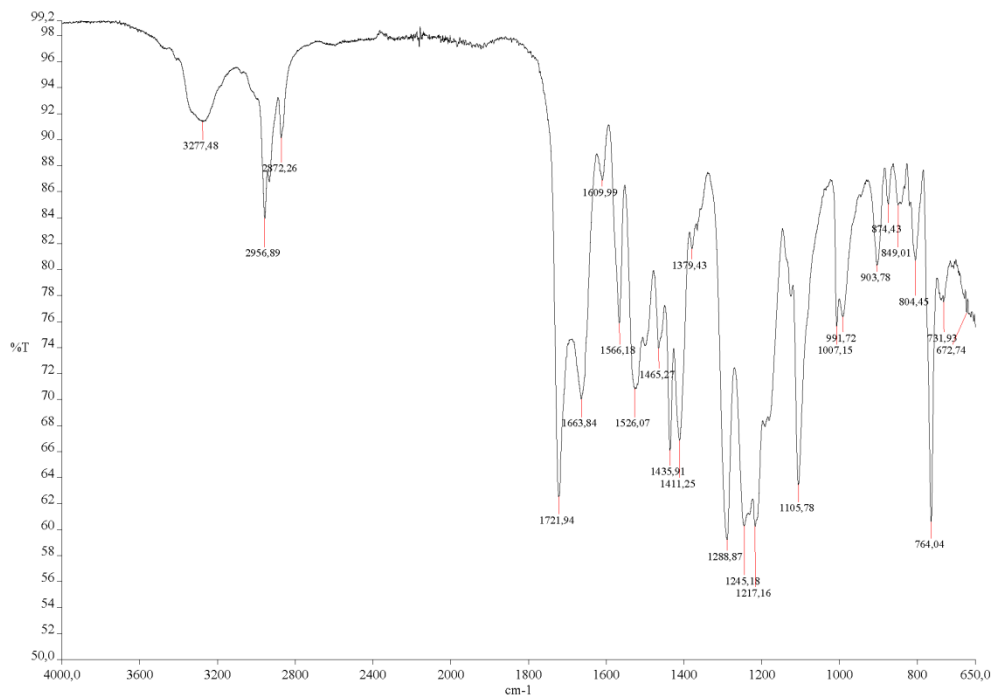

**5,5'-(2,5-Dimethyl-1,4-phenylene)bis(thiophene-5,2-diyl)dimethanol (2c)**

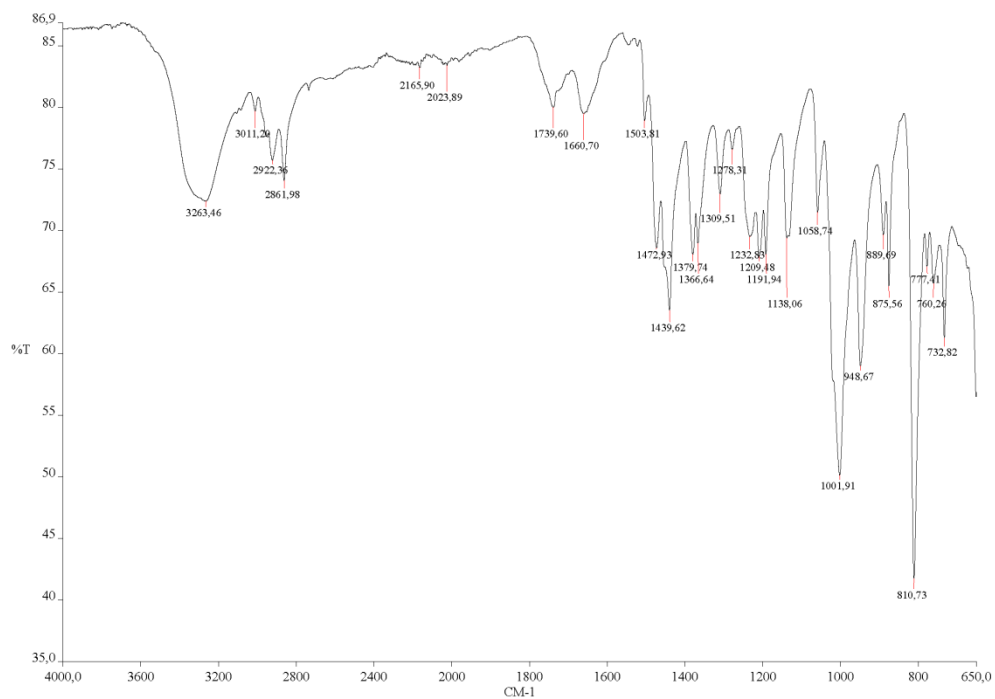

**5,5',5''-(Nitrilotris(benzene-4,1-diyl))tris(thiophene-5,2-diyl) trimethanol (3c)**

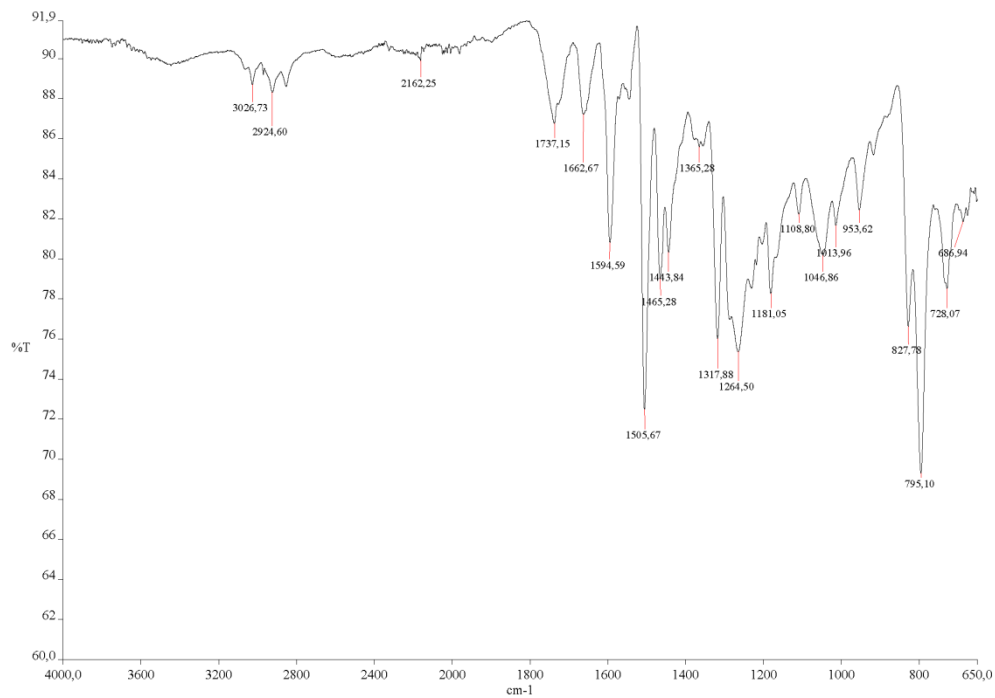

### 1,4-Bis(5-chloromethyl)thiophen-2-yl)benzene (1d)

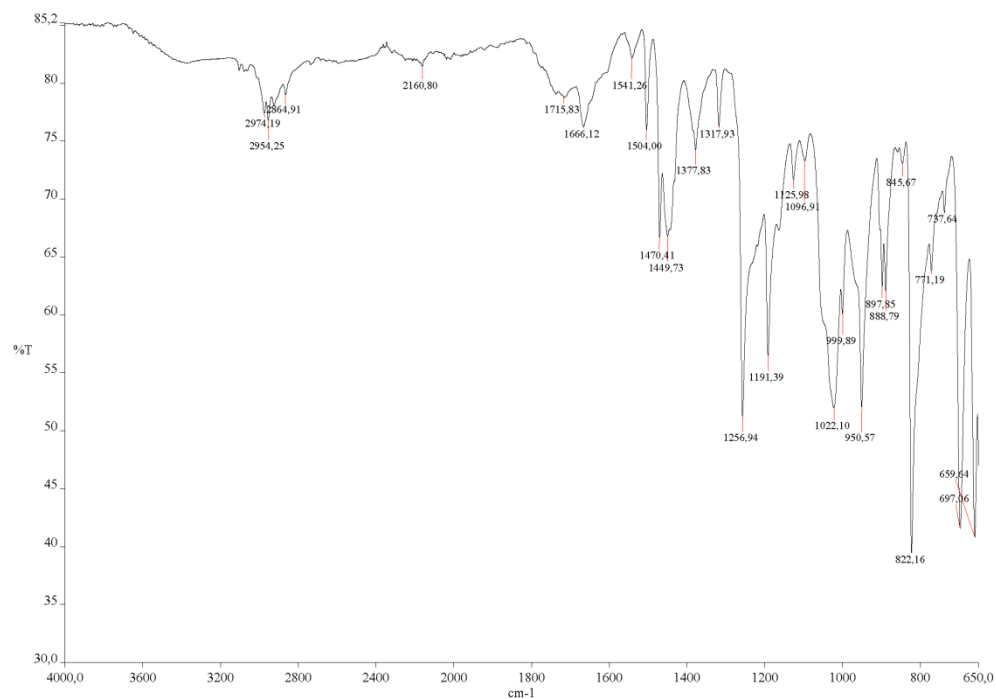

### 5,5'-(2,5-Dimethyl-1,4-phenylene)bis(2-(chloromethyl)thiophene) (2d)

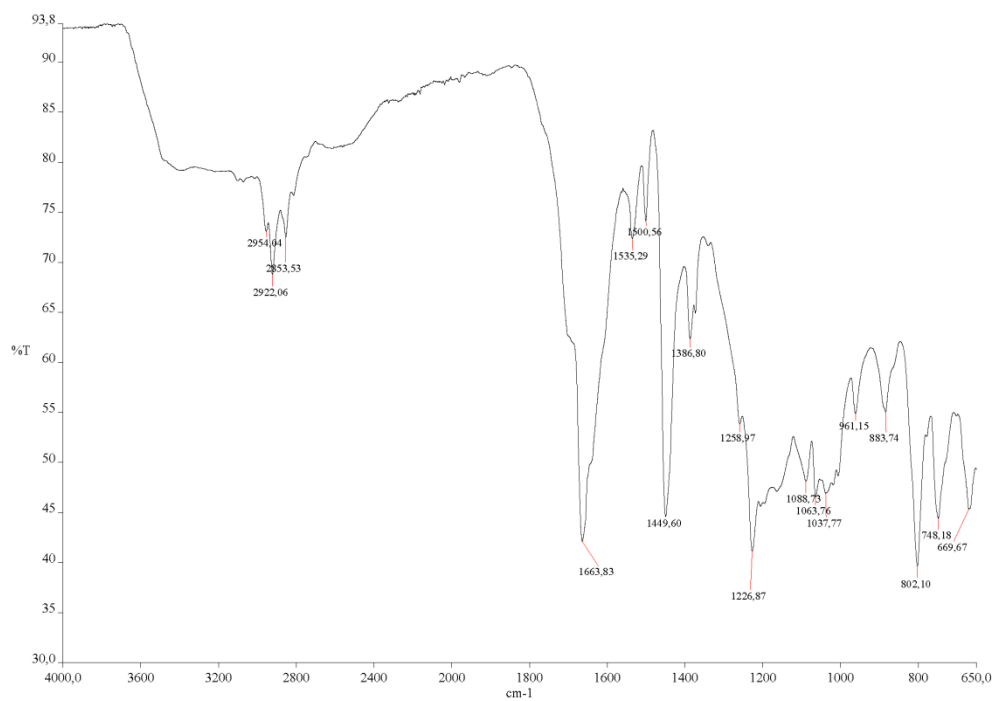



### Tris(4-(5-(chloromethyl)thiophen-2-yl)phenyl)amine (3d)

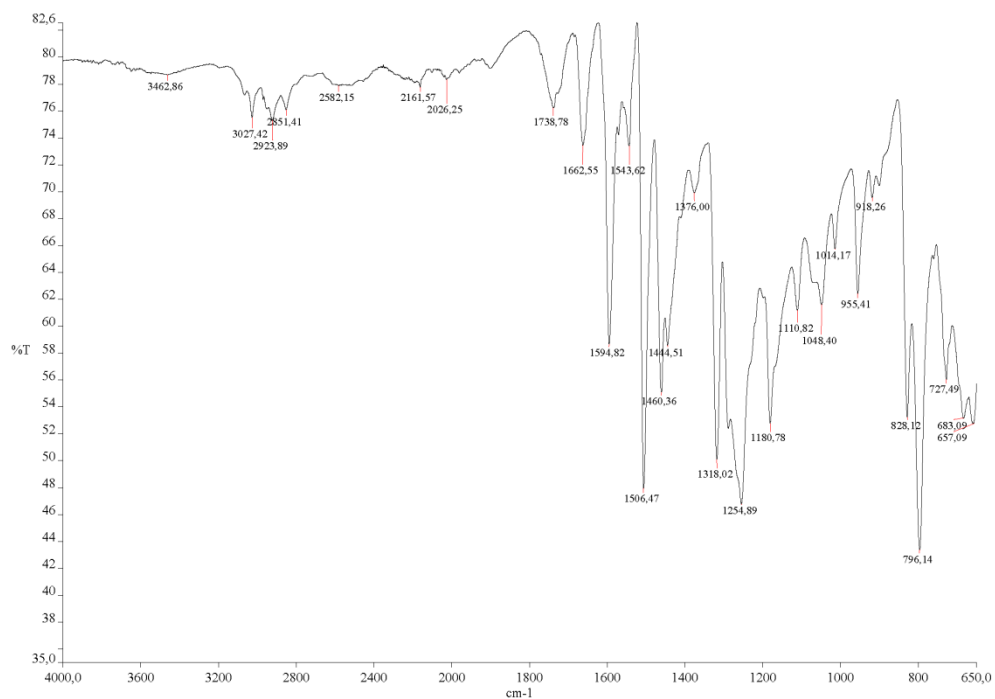

### Tetraethyl-((5,5'-(1,4-phenylene)bis(thiophene-5,2-diyl)) bis(methylene))bis(phosphonate) (1e)

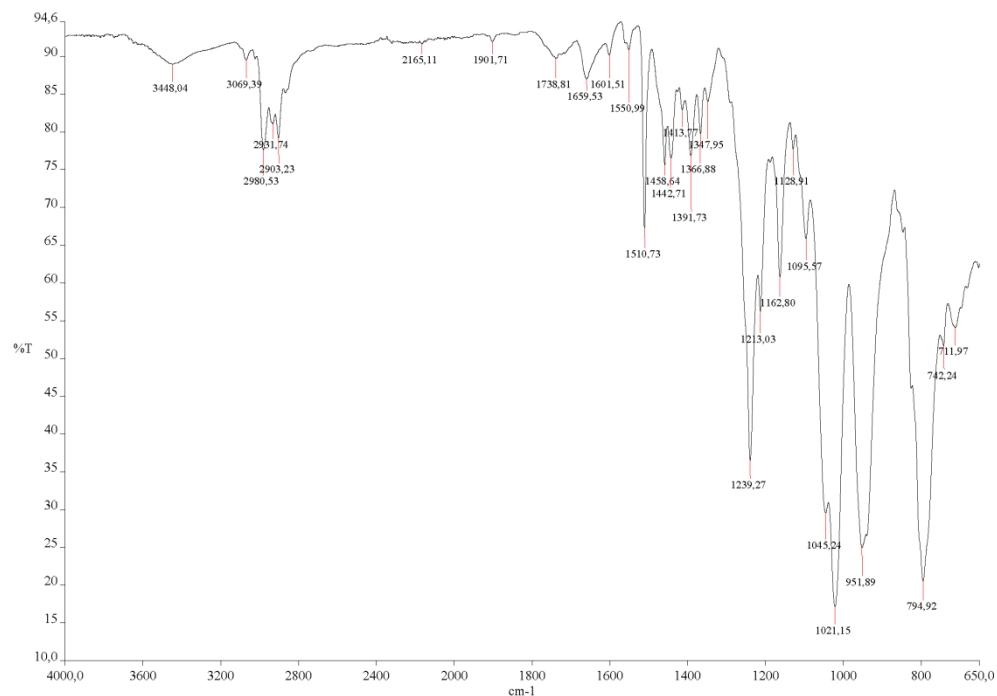

**Tetraethyl-((5,5`-(2,5-dimethyl-1,4-phenylene)bis(thiophene-5,2-diy))bis(methylene))bis(phosphonate) (2e)**

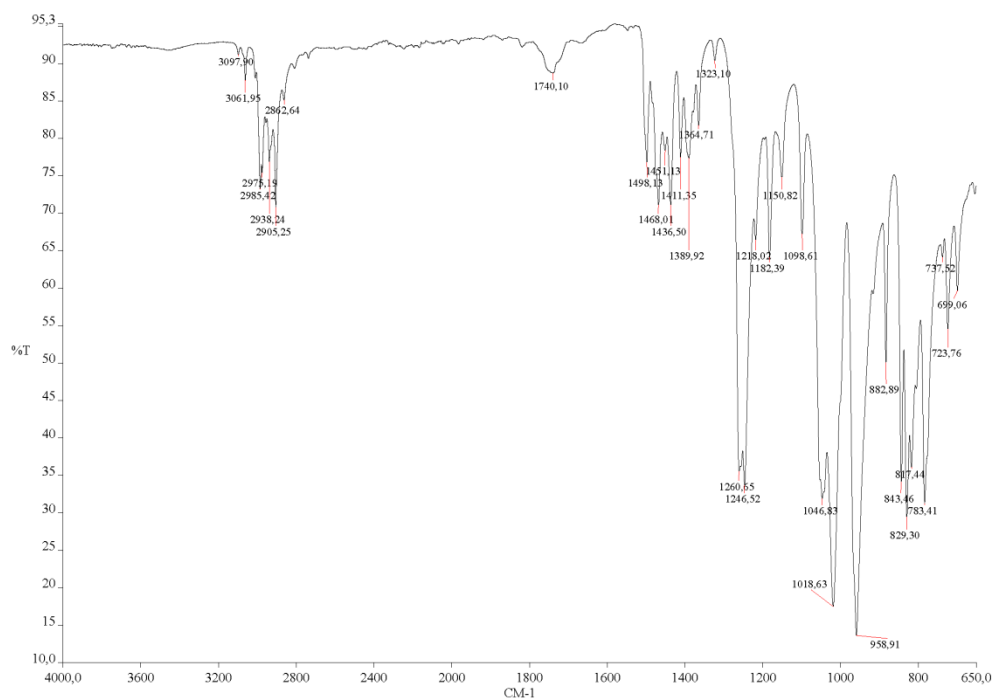

**Hexaethyl((5,5',5``-(nitrotris(benzene-4,1-diy))tris(thiophene-5,2-diy))tris(methylene)tris(phosphonate) (3e)**

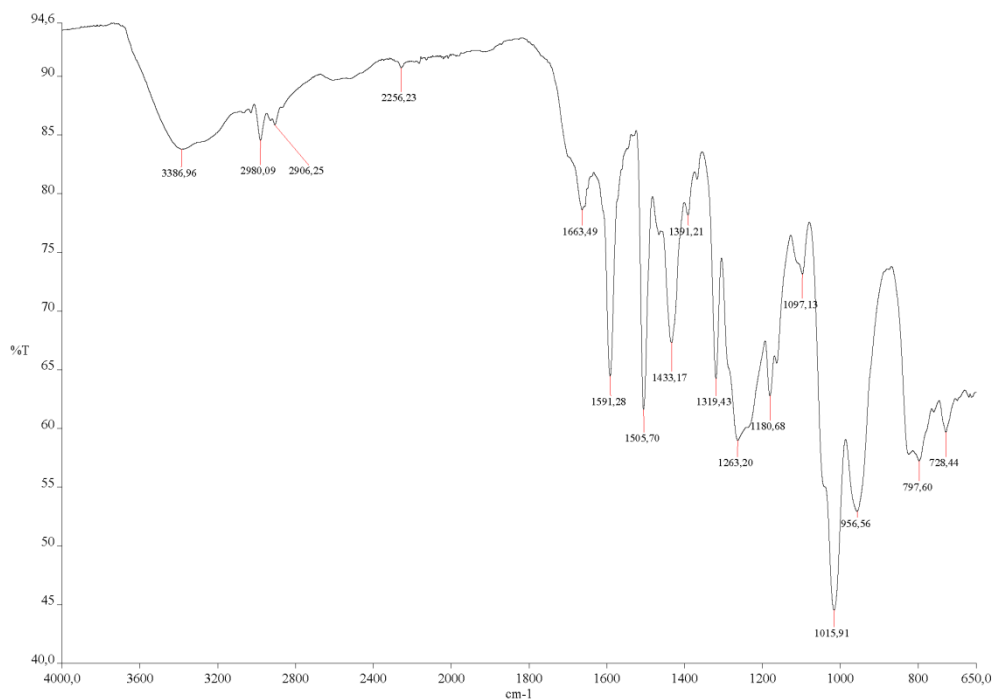

Supplement: c2dt32553e.pdf [file c2dt32553e.pdf]
